# Supplementary material
Source: PubMed Central journal article supplement (PMC3002181)
Supplement: ct100529s_si_001.pdf [file ct100529s_si_001.pdf]

# Supporting Information for “Optoelectronic and Excitonic Properties of Oligoacenes: Substantial Improvements from Range-Separated Time-Dependent Density Functional Theory”

*Bryan M. Wong*<sup>\*a</sup> and *Timothy H. Hsieh*<sup>b</sup>

<sup>a</sup> Materials Chemistry Department, Sandia National Laboratories, Livermore, California 94551

<sup>b</sup> Department of Physics, Massachusetts Institute of Technology, Cambridge, Massachusetts 02139

\*Corresponding author. E-mail: [bmwong@sandia.gov](mailto:bmwong@sandia.gov)

## Contents

- p. S3, Figure SI-1:** Electron density difference maps for the  $L_a$  and  $L_b$  excited states of naphthalene
- p. S4, Figure SI-2:** Electron density difference maps for the  $L_a$  and  $L_b$  excited states of anthracene
- p. S5, Figure SI-3:** Electron density difference maps for the  $L_a$  and  $L_b$  excited states of tetracene
- p. S6, Figure SI-4:** Electron density difference maps for the  $L_a$  and  $L_b$  excited states of pentacene
- p. S7, Figure SI-5:** Electron density difference maps for the  $L_a$  and  $L_b$  excited states of hexacene
- p. S8, Figure SI-6:** Electron density difference maps for the  $L_a$  and  $L_b$  excited states of heptacene
- p. S9-S10, Figure SI-7:** B3LYP and LC-BLYP coordinate (**Q**) density matrices for all the  $L_a$  excited states in the linear acenes
- p. S11-S12, Figure SI-8:** B3LYP and LC-BLYP coordinate (**Q**) density matrices for all the  $L_b$  excited states in the linear acenes
- p. S13-S14, Figure SI-9:** B3LYP and LC-BLYP momentum (**P**) density matrices for all the  $L_a$  excited states in the linear acenes

**p. S15-S15, Figure SI-10:** B3LYP and LC-BLYP momentum (**P**) density matrices for all the  $L_b$  excited states in the linear acenes

**p. S17-S22,** Reference Cartesian coordinates for all the linear acenes optimized at the B3LYP/cc-pVTZ level of theory

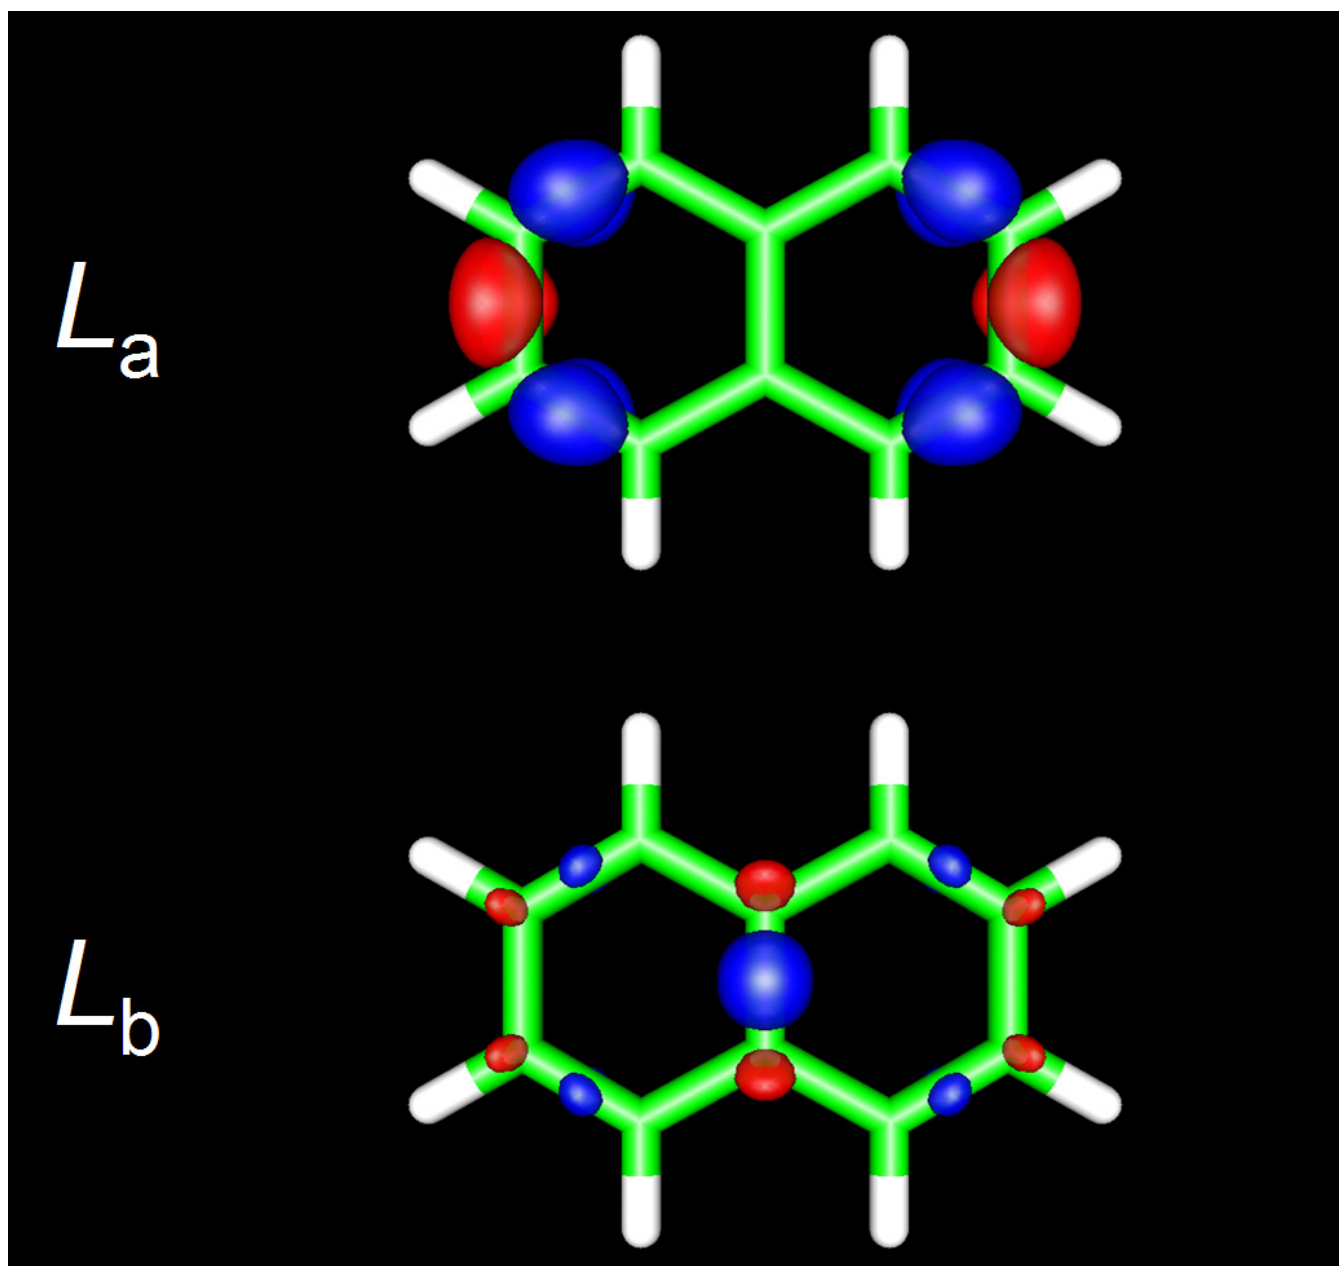

**Figure SI-1.** Electron density difference maps ( $\rho_{\text{excited}} - \rho_{\text{ground}}$ ) for the  $L_a$  and  $L_b$  excited states of naphthalene computed at the CC2 level of theory. Red regions denote a positive density difference (accumulation of density upon electronic excitation), and blue regions represent a negative density difference (depletion of density upon excitation). Both figures are plotted using the same isosurface contour value.

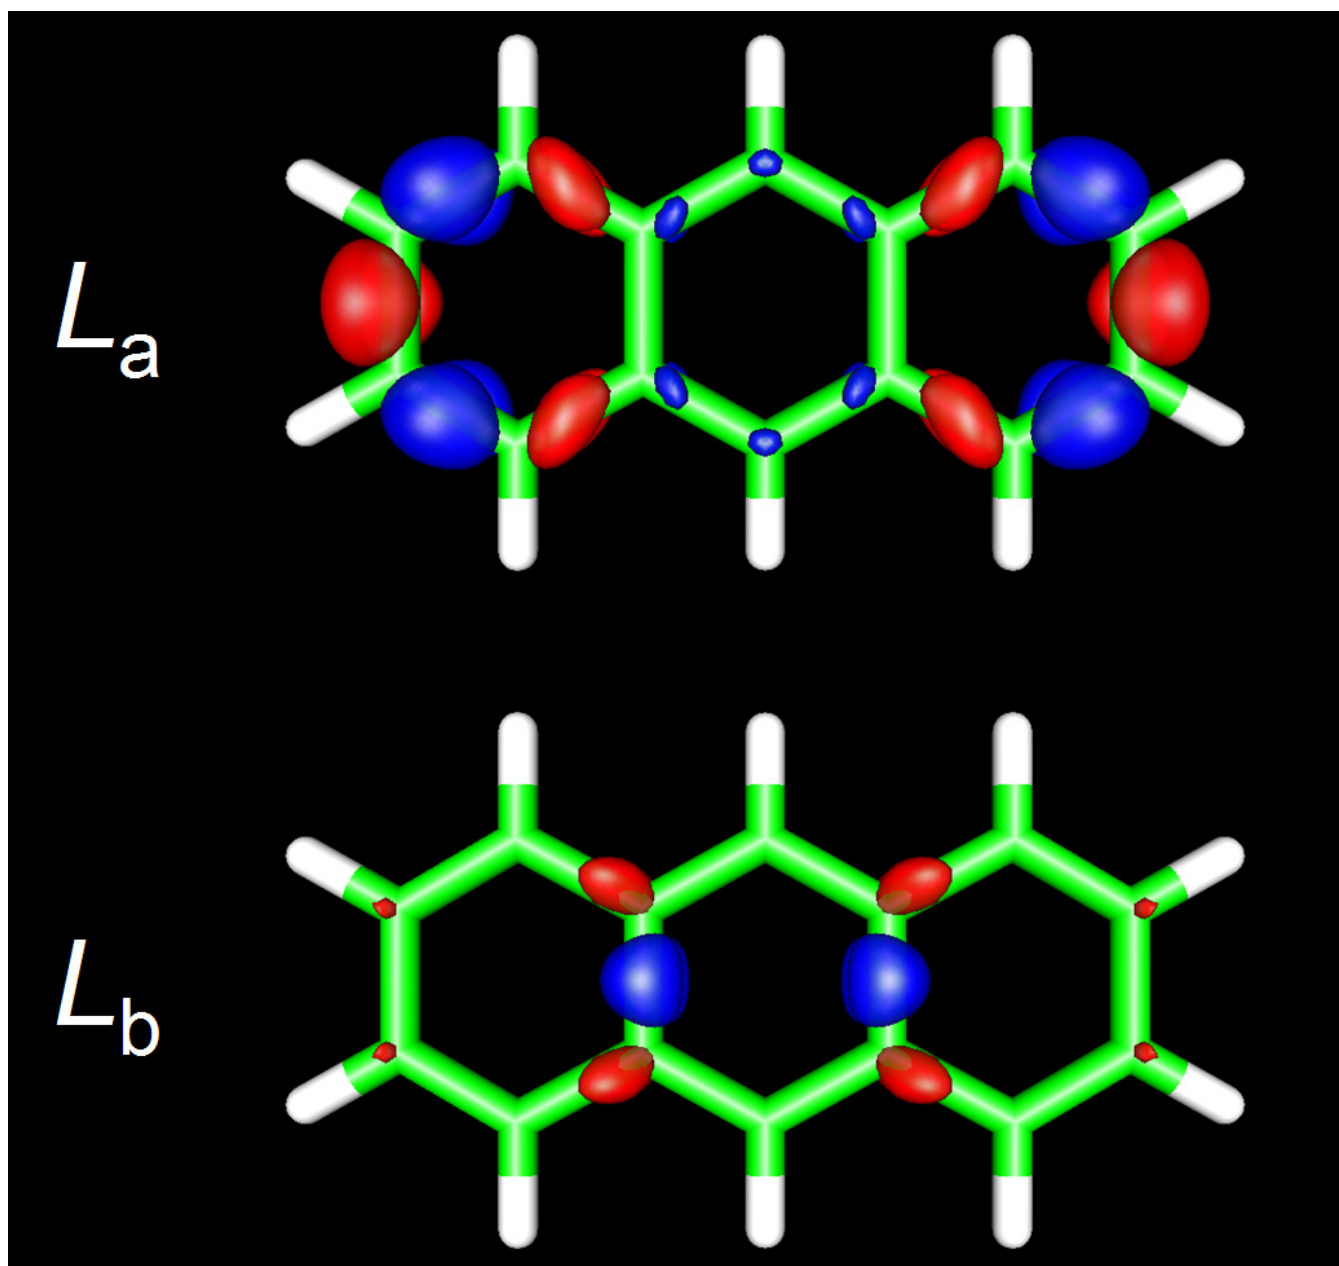

**Figure SI-2.** Electron density difference maps ( $\rho_{\text{excited}} - \rho_{\text{ground}}$ ) for the  $L_a$  and  $L_b$  excited states of anthracene computed at the CC2 level of theory. Red regions denote a positive density difference (accumulation of density upon electronic excitation), and blue regions represent a negative density difference (depletion of density upon excitation). Both figures are plotted using the same isosurface contour value.

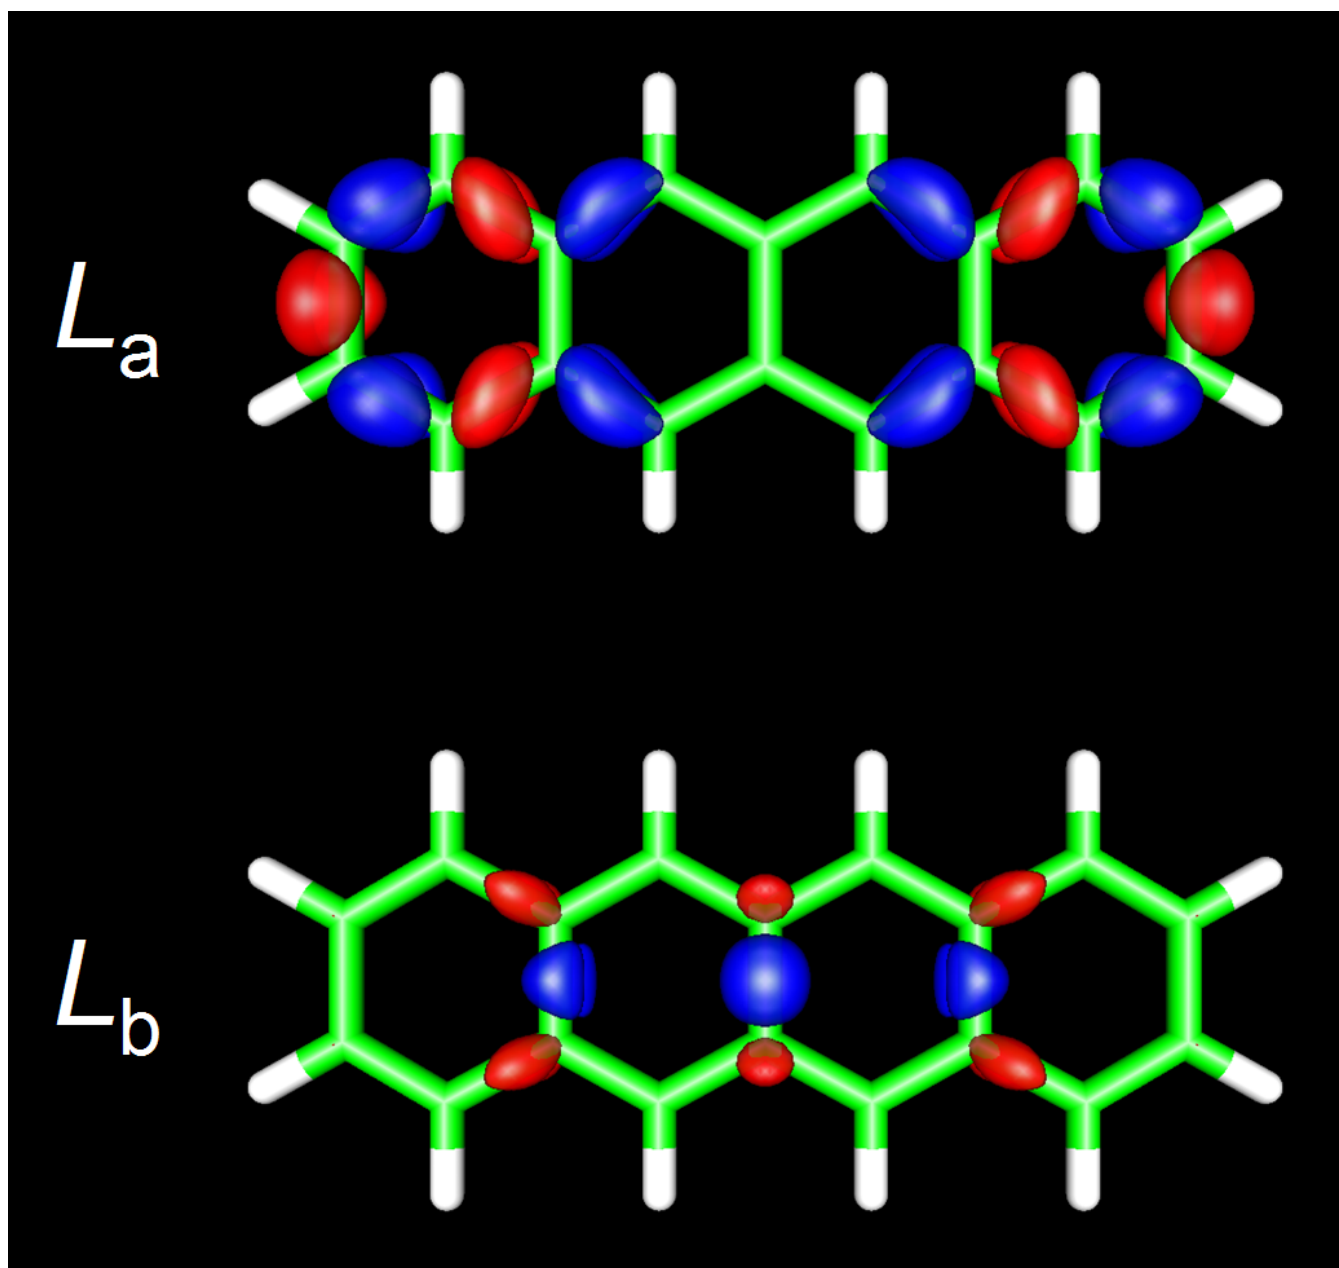

**Figure SI-3.** Electron density difference maps ( $\rho_{\text{excited}} - \rho_{\text{ground}}$ ) for the  $L_a$  and  $L_b$  excited states of tetracene computed at the CC2 level of theory. Red regions denote a positive density difference (accumulation of density upon electronic excitation), and blue regions represent a negative density difference (depletion of density upon excitation). Both figures are plotted using the same isosurface contour value.

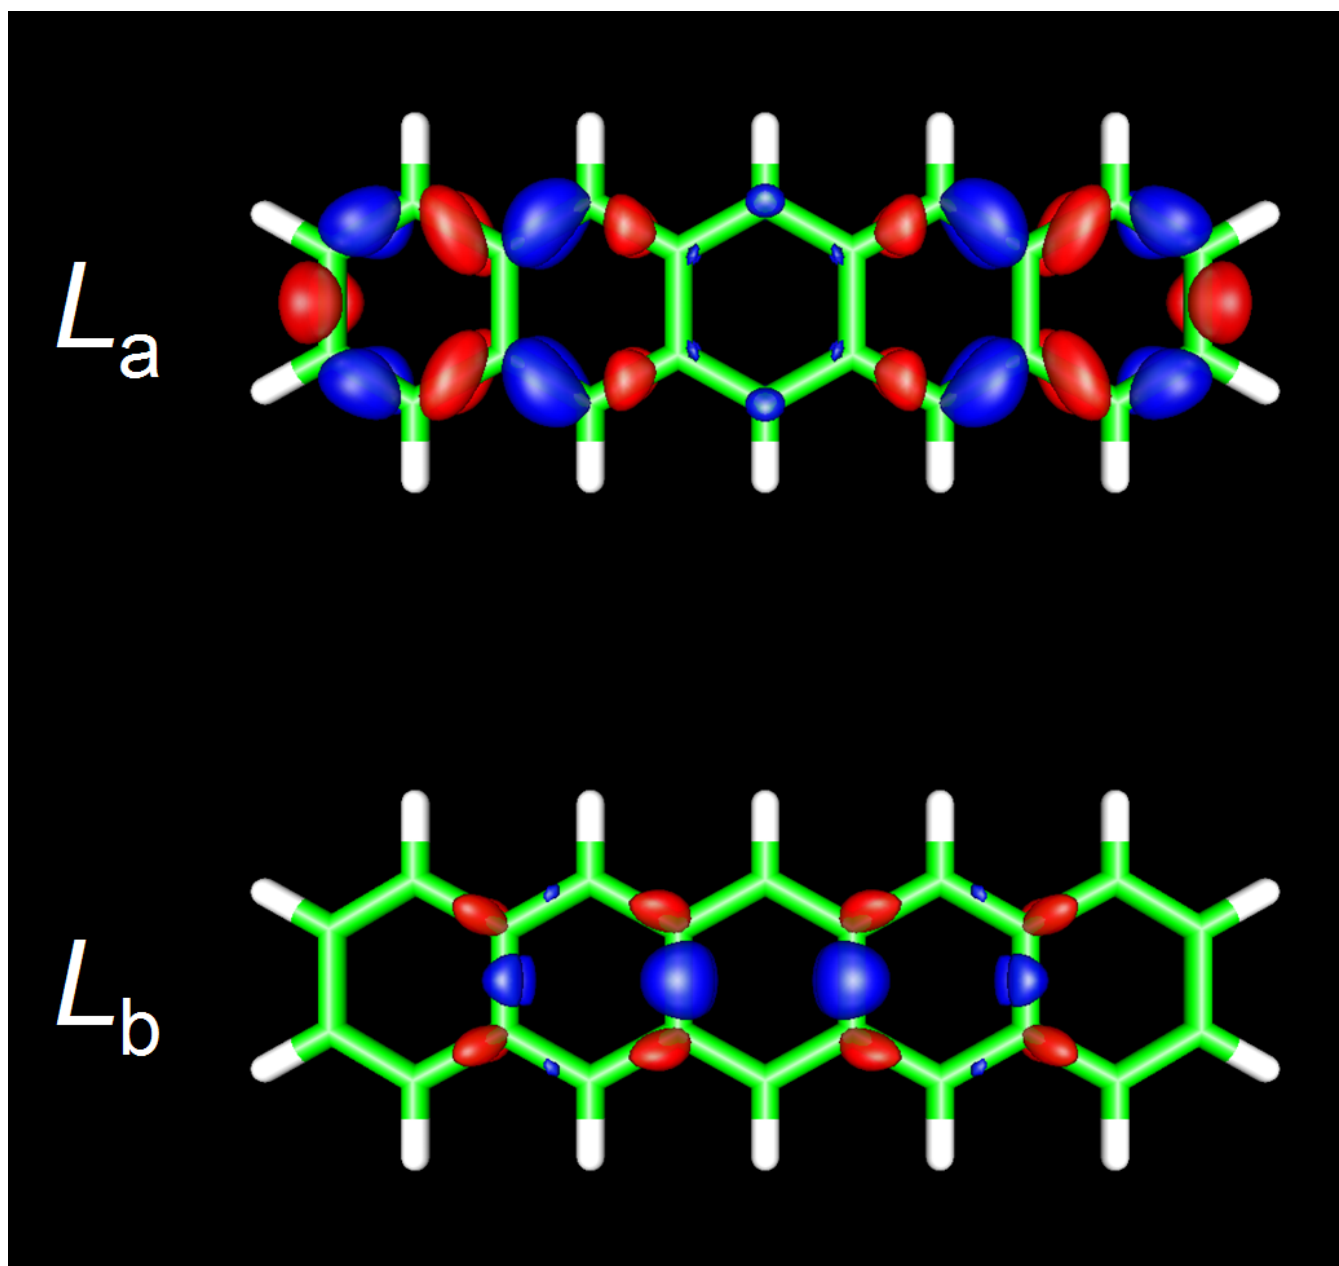

**Figure SI-4.** Electron density difference maps ( $\rho_{\text{excited}} - \rho_{\text{ground}}$ ) for the  $L_a$  and  $L_b$  excited states of pentacene computed at the CC2 level of theory. Red regions denote a positive density difference (accumulation of density upon electronic excitation), and blue regions represent a negative density difference (depletion of density upon excitation). Both figures are plotted using the same isosurface contour value.

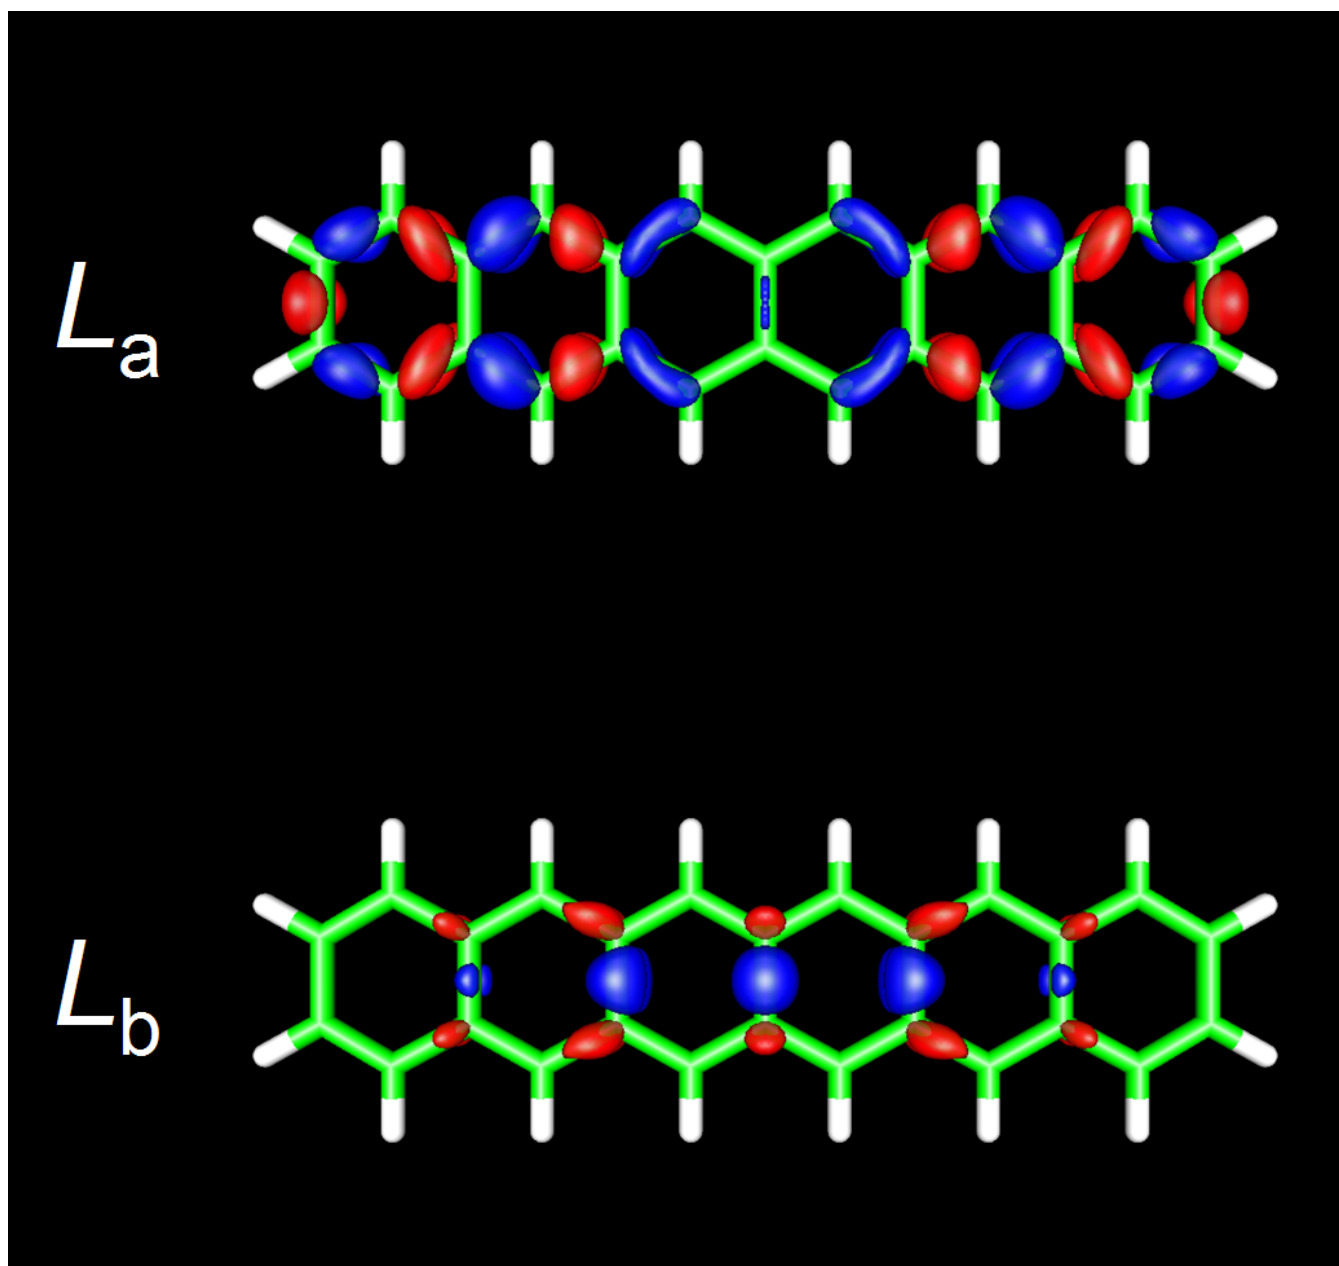

**Figure SI-5.** Electron density difference maps ( $\rho_{\text{excited}} - \rho_{\text{ground}}$ ) for the  $L_a$  and  $L_b$  excited states of hexacene computed at the CC2 level of theory. Red regions denote a positive density difference (accumulation of density upon electronic excitation), and blue regions represent a negative density difference (depletion of density upon excitation). Both figures are plotted using the same isosurface contour value.

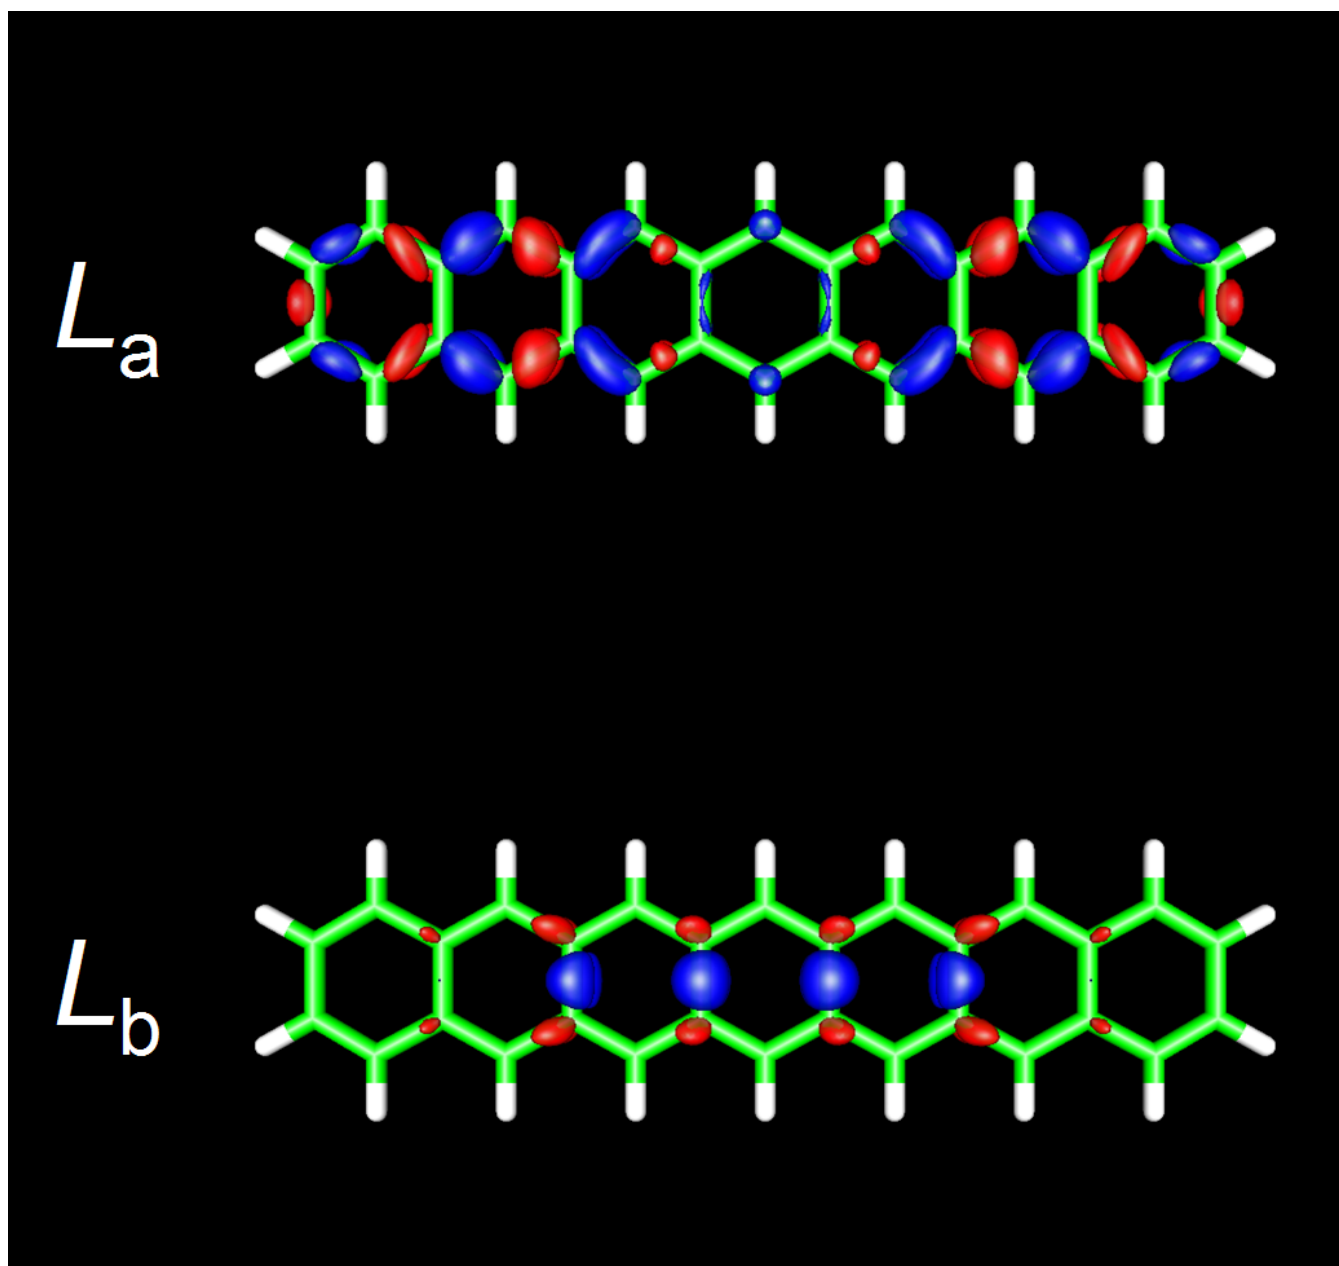

**Figure SI-6.** Electron density difference maps ( $\rho_{\text{excited}} - \rho_{\text{ground}}$ ) for the  $L_a$  and  $L_b$  excited states of heptacene computed at the CC2 level of theory. Red regions denote a positive density difference (accumulation of density upon electronic excitation), and blue regions represent a negative density difference (depletion of density upon excitation). Both figures are plotted using the same isosurface contour value.



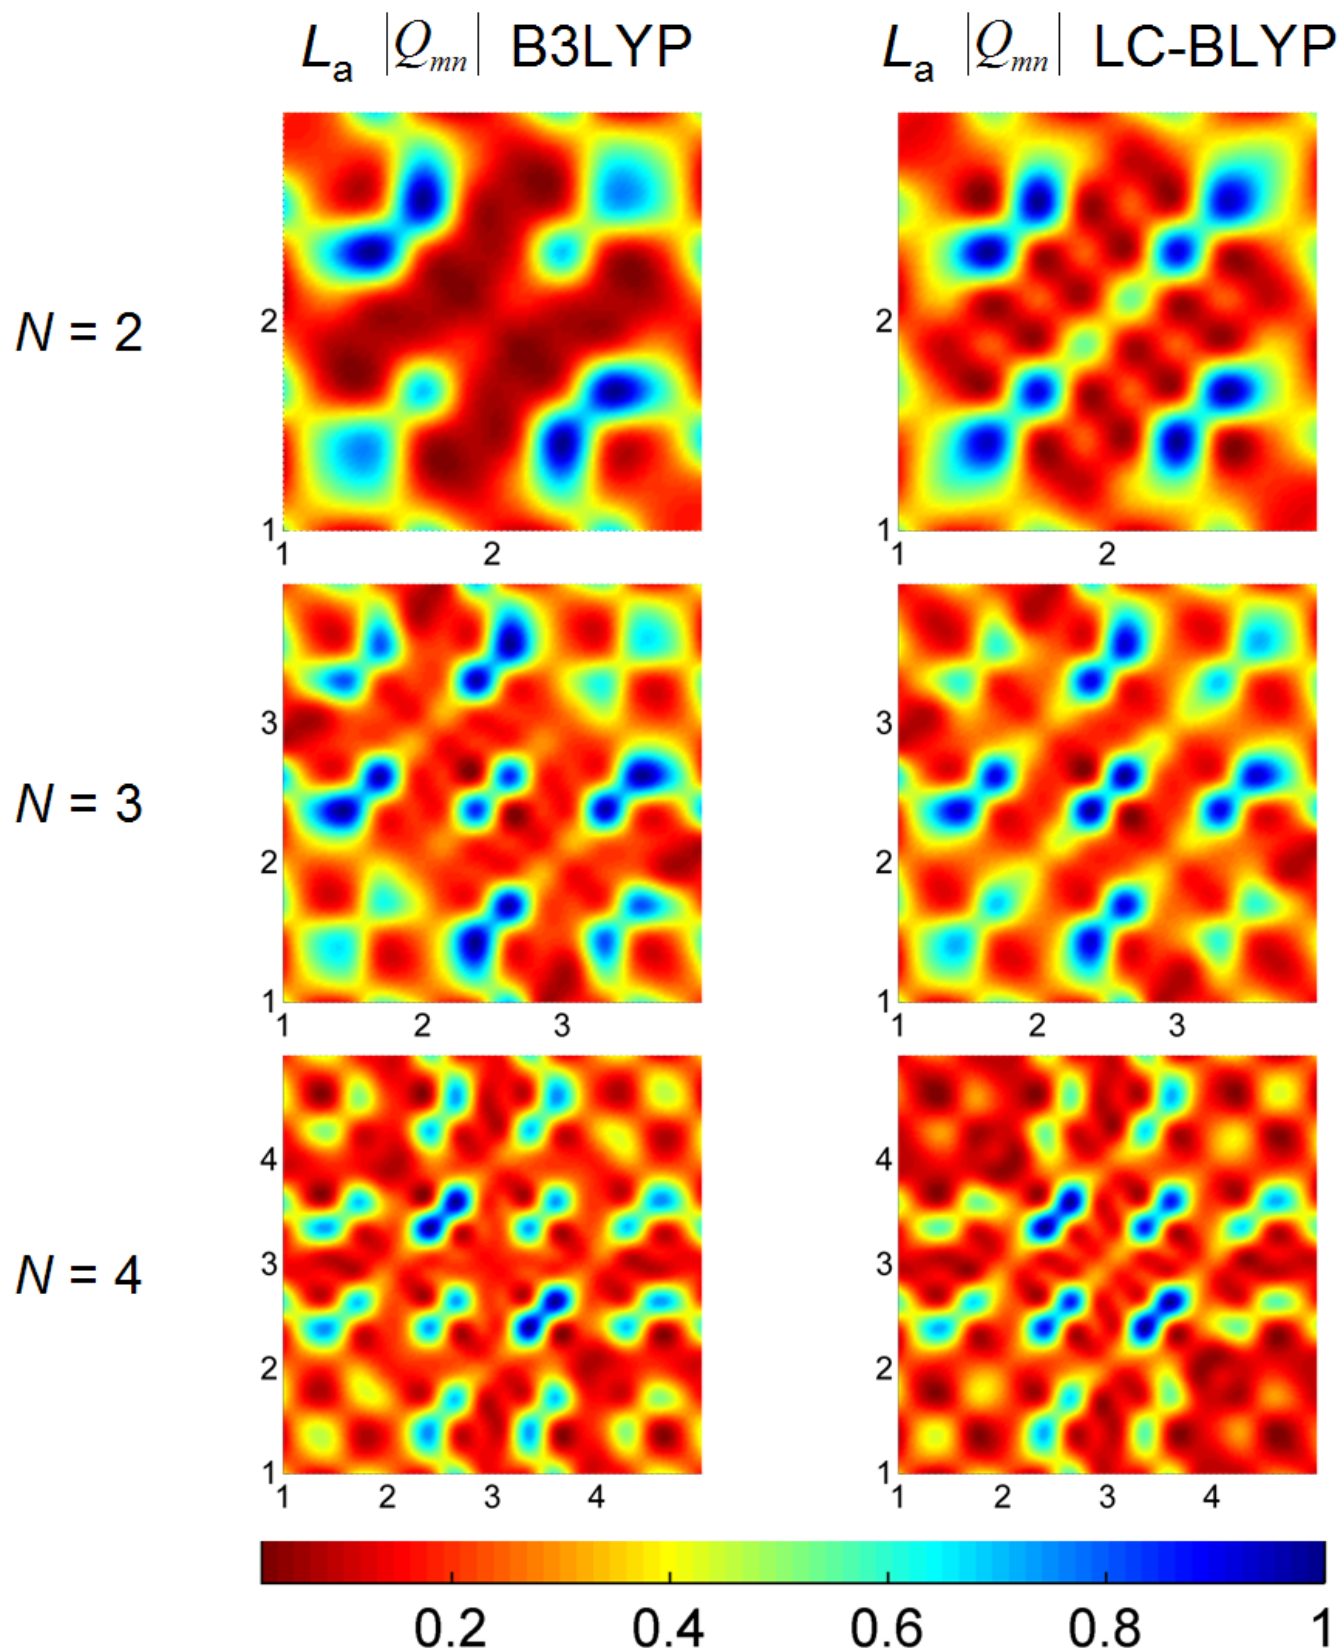

**Figure SI-7.** B3LYP and LC-BLYP contour plots of coordinate density matrices ( $\mathbf{Q}$ ) for the  $L_a$  excited state in the linear acenes. The  $x$ - and  $y$ -axis labels represent the number of benzene repeat units in the molecule. The elements of the coordinate matrix,  $Q_{mn}$ , give a measure of exciton delocalization between sites  $m$  ( $x$ -axis) and  $n$  ( $y$ -axis). The color scale is given at the bottom.

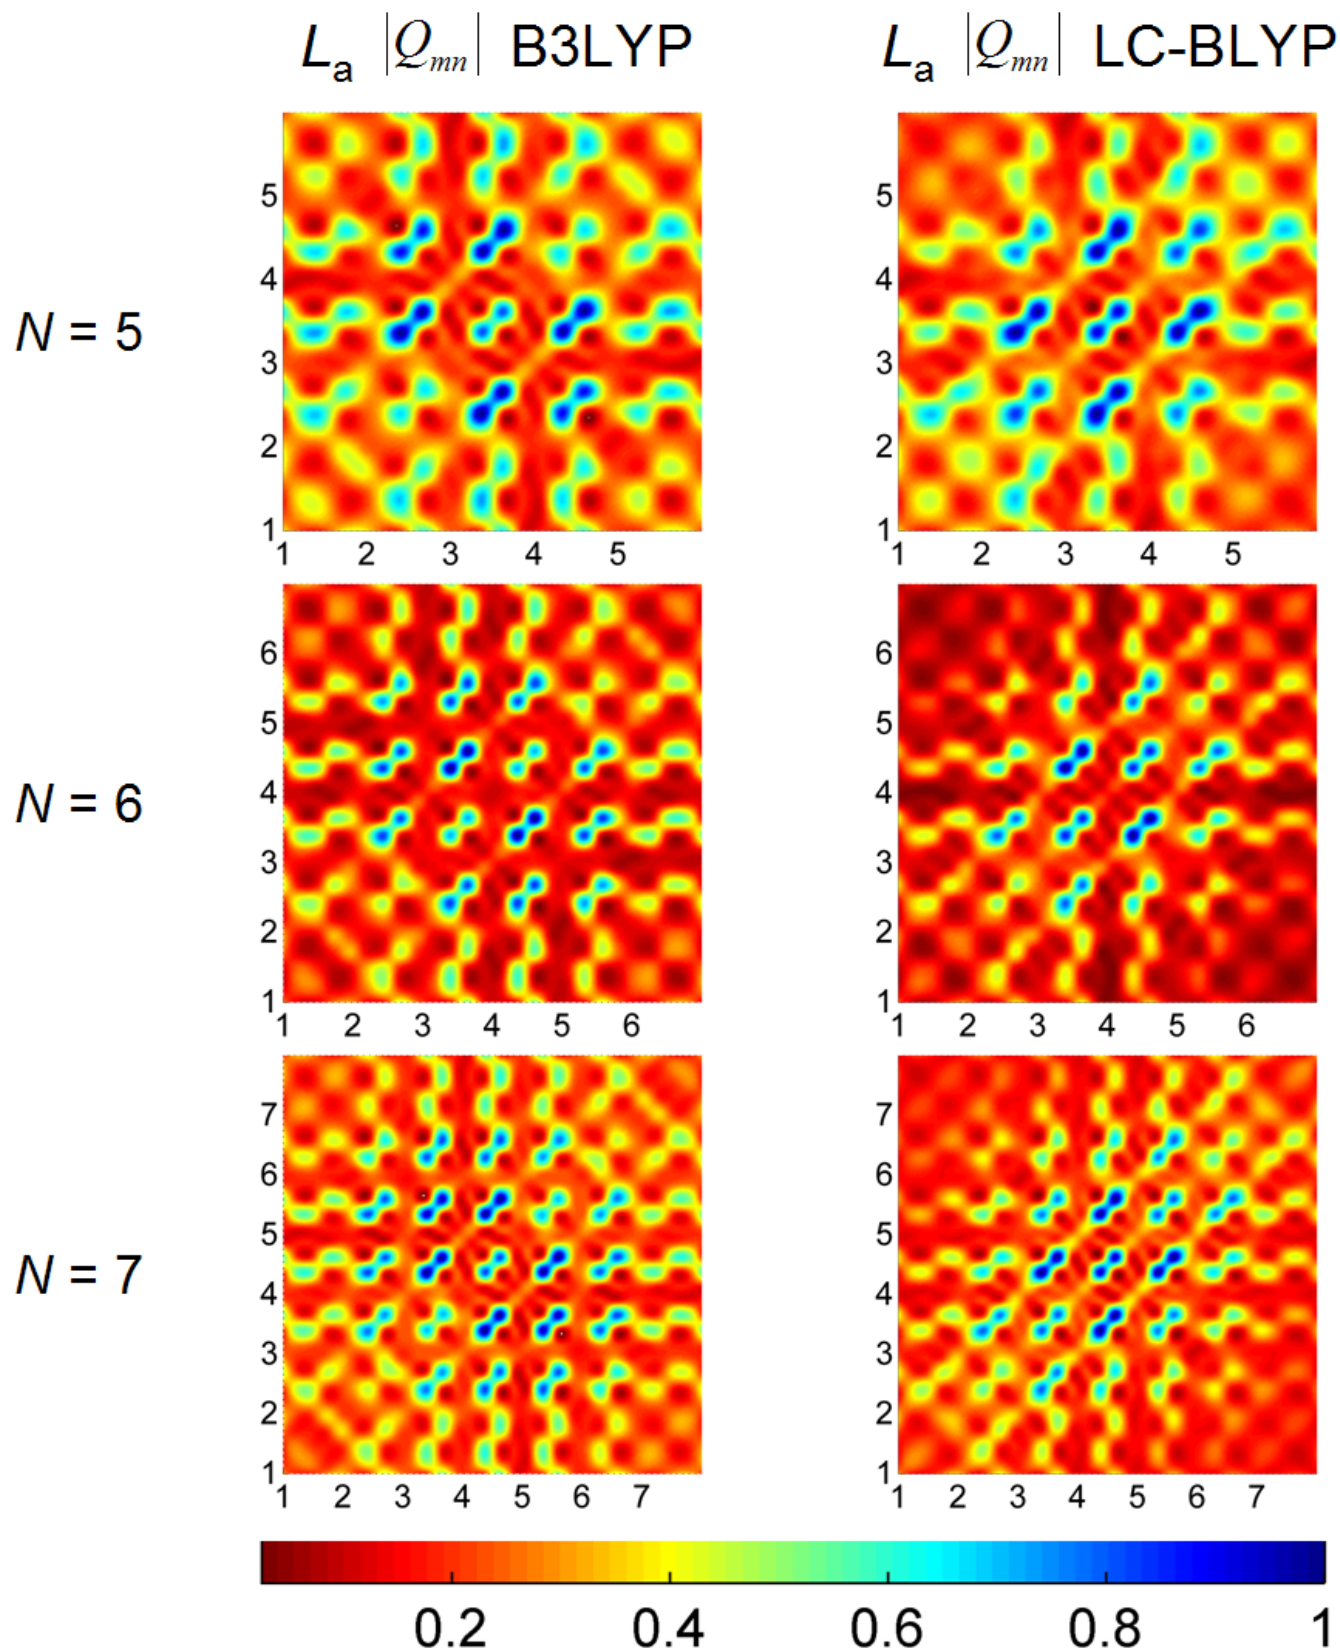

**Figure SI-7 (continued).** B3LYP and LC-BLYP contour plots of coordinate density matrices ( $Q$ ) for the  $L_a$  excited state in the linear acenes. The  $x$ - and  $y$ -axis labels represent the number of benzene repeat units in the molecule. The elements of the coordinate matrix,  $Q_{mn}$ , give a measure of exciton delocalization between sites  $m$  ( $x$ -axis) and  $n$  ( $y$ -axis). The color scale is given at the bottom.

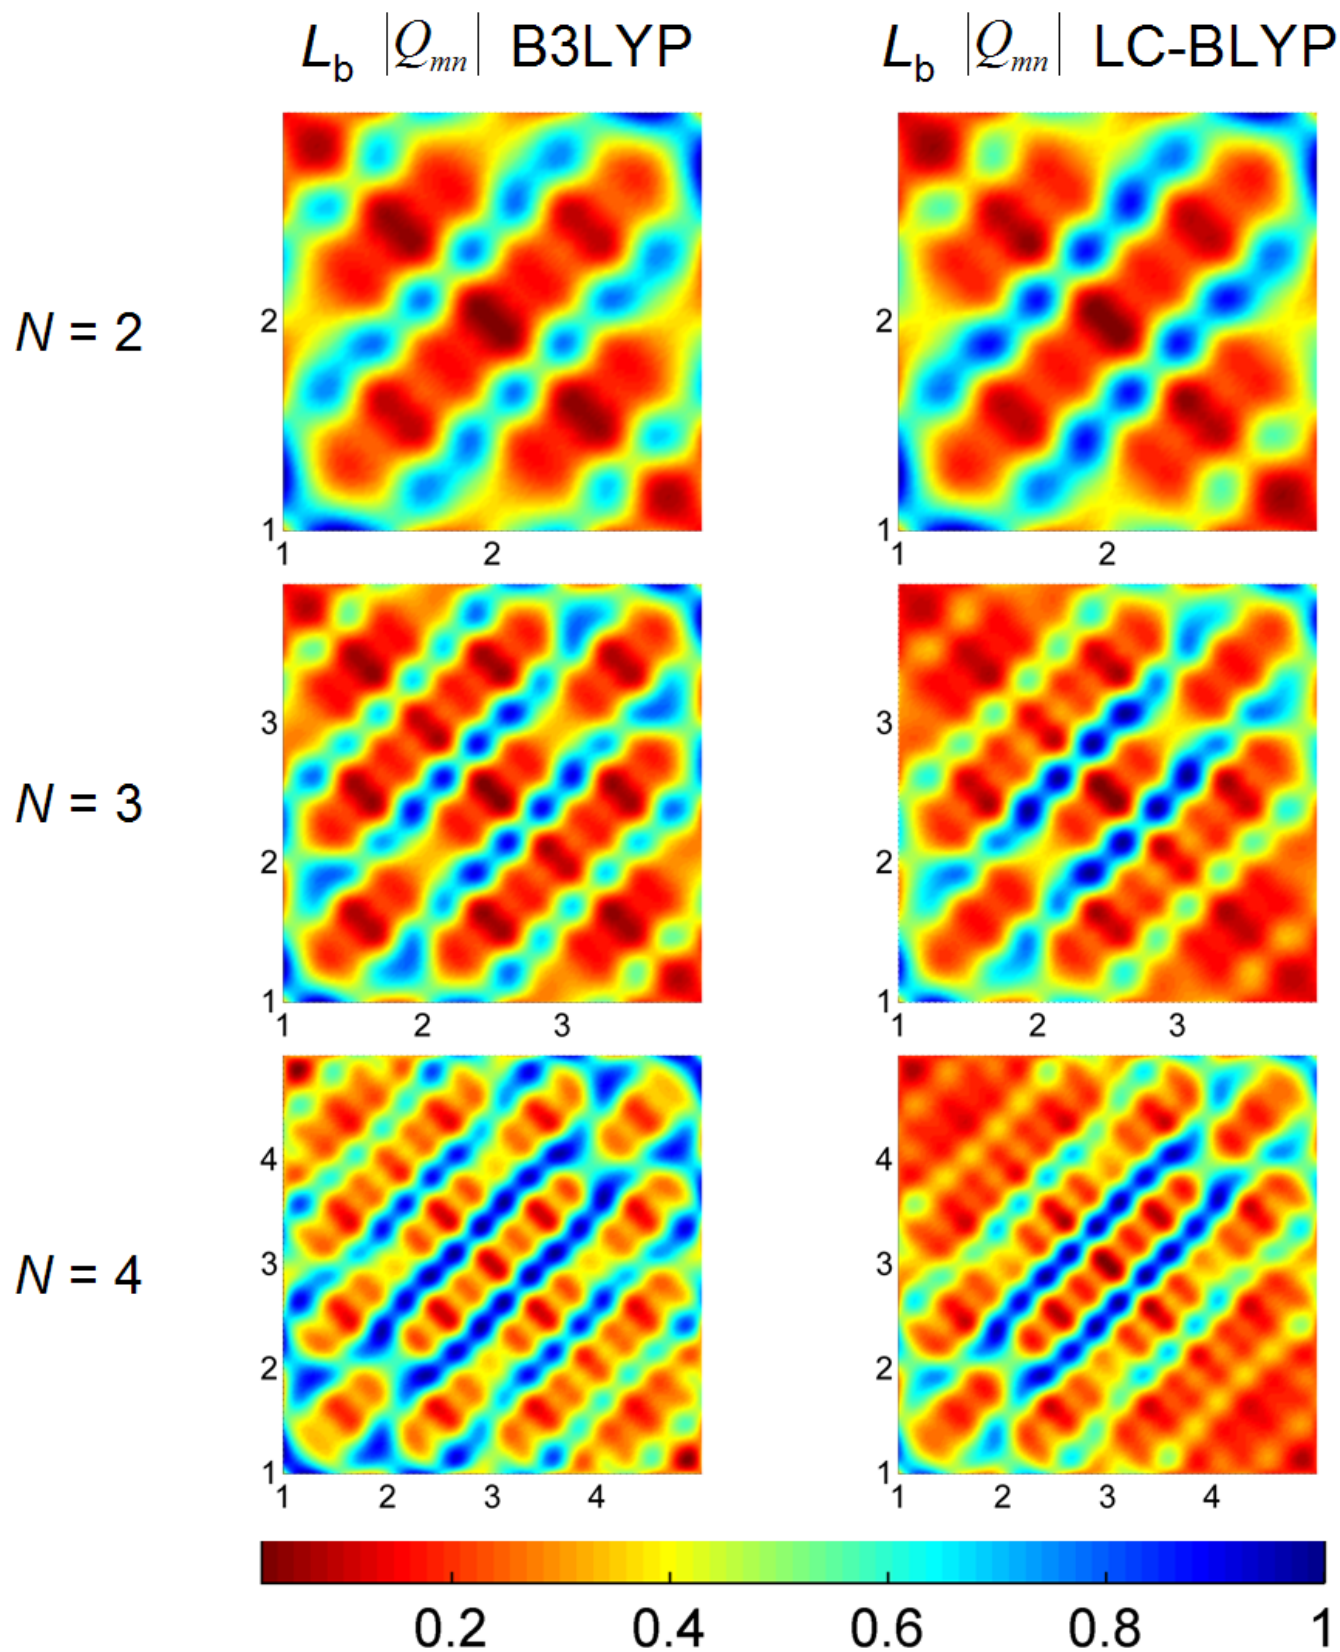

**Figure SI-8.** B3LYP and LC-BLYP contour plots of coordinate density matrices ( $Q$ ) for the  $L_b$  excited state in the linear acenes. The  $x$ - and  $y$ -axis labels represent the number of benzene repeat units in the molecule. The elements of the coordinate matrix,  $Q_{mn}$ , give a measure of exciton delocalization between sites  $m$  ( $x$ -axis) and  $n$  ( $y$ -axis). The color scale is given at the bottom.



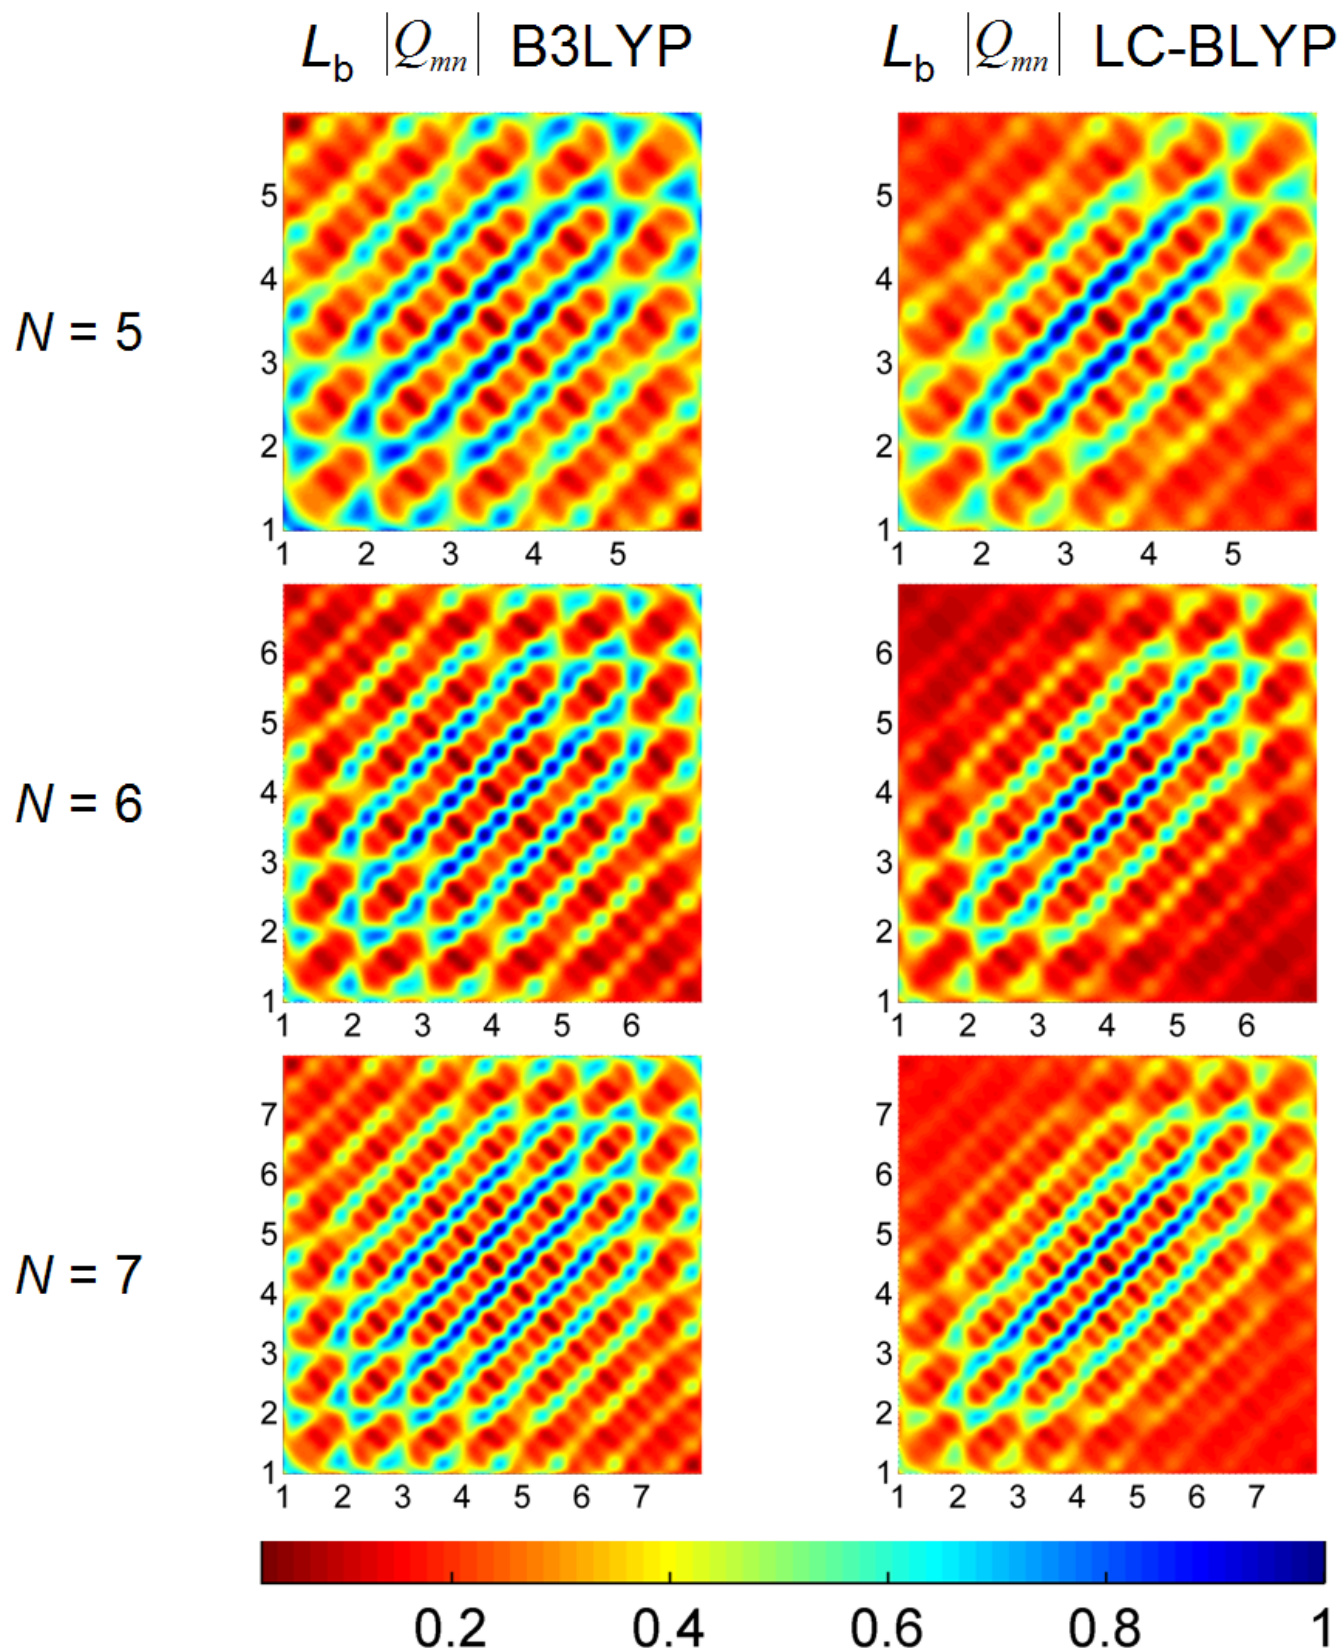

**Figure SI-8 (continued).** B3LYP and LC-BLYP contour plots of coordinate density matrices ( $Q$ ) for the  $L_b$  excited state in the linear acenes. The  $x$ - and  $y$ -axis labels represent the number of benzene repeat units in the molecule. The elements of the coordinate matrix,  $Q_{mn}$ , give a measure of exciton delocalization between sites  $m$  ( $x$ -axis) and  $n$  ( $y$ -axis). The color scale is given at the bottom.

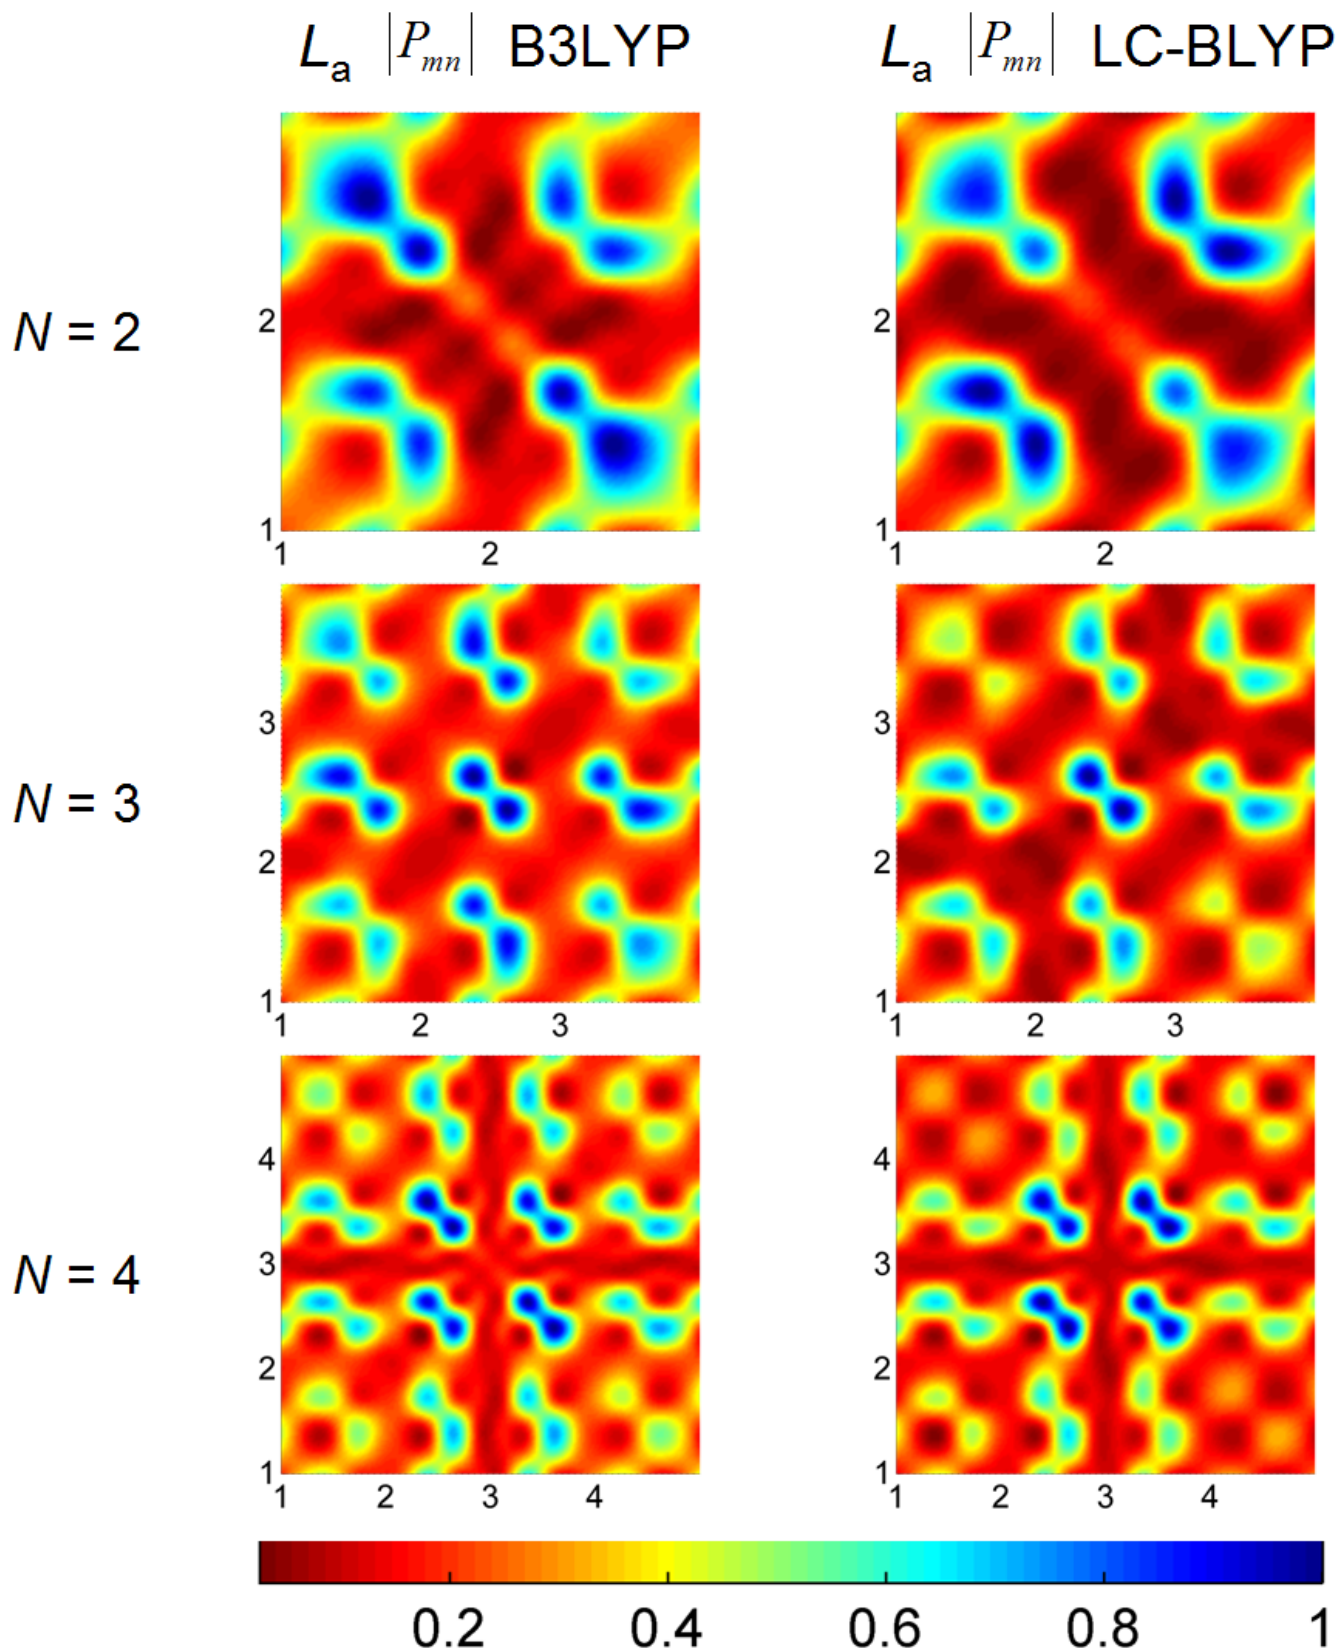

**Figure SI-9.** B3LYP and LC-BLYP contour plots of momentum density matrices ( $\mathbf{P}$ ) for the  $L_a$  excited state in the linear acenes. The  $x$ - and  $y$ -axis labels represent the number of benzene repeat units in the molecule. The elements of the momentum matrix,  $P_{mn}$ , represent the probability amplitude of an electron-hole pair oscillation between sites  $m$  ( $x$ -axis) and  $n$  ( $y$ -axis). The color scale is given at the bottom.

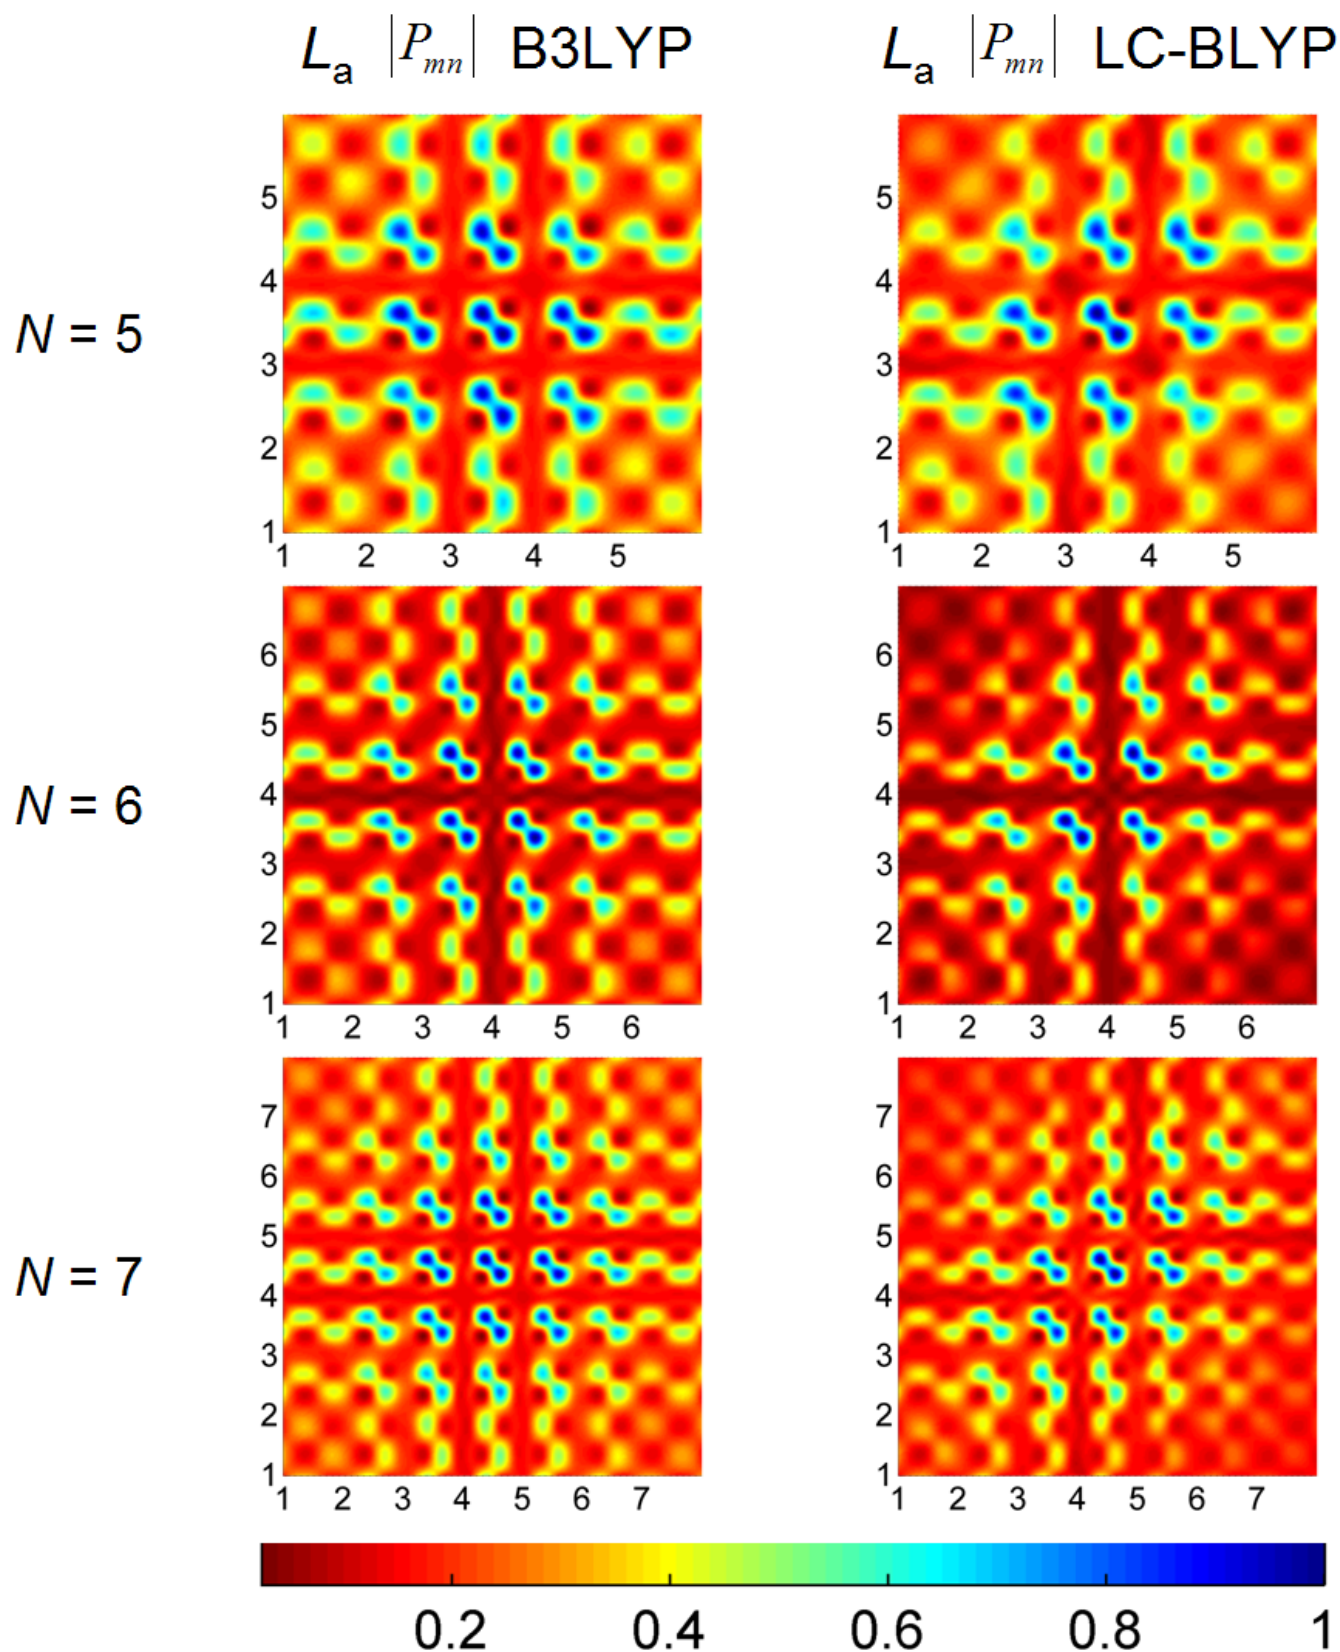

**Figure SI-9 (continued).** B3LYP and LC-BLYP contour plots of momentum density matrices ( $\mathbf{P}$ ) for the  $L_a$  excited state in the linear acenes. The  $x$ - and  $y$ -axis labels represent the number of benzene repeat units in the molecule. The elements of the momentum matrix,  $P_{mn}$ , represent the probability amplitude of an electron-hole pair oscillation between sites  $m$  ( $x$ -axis) and  $n$  ( $y$ -axis). The color scale is given at the bottom.



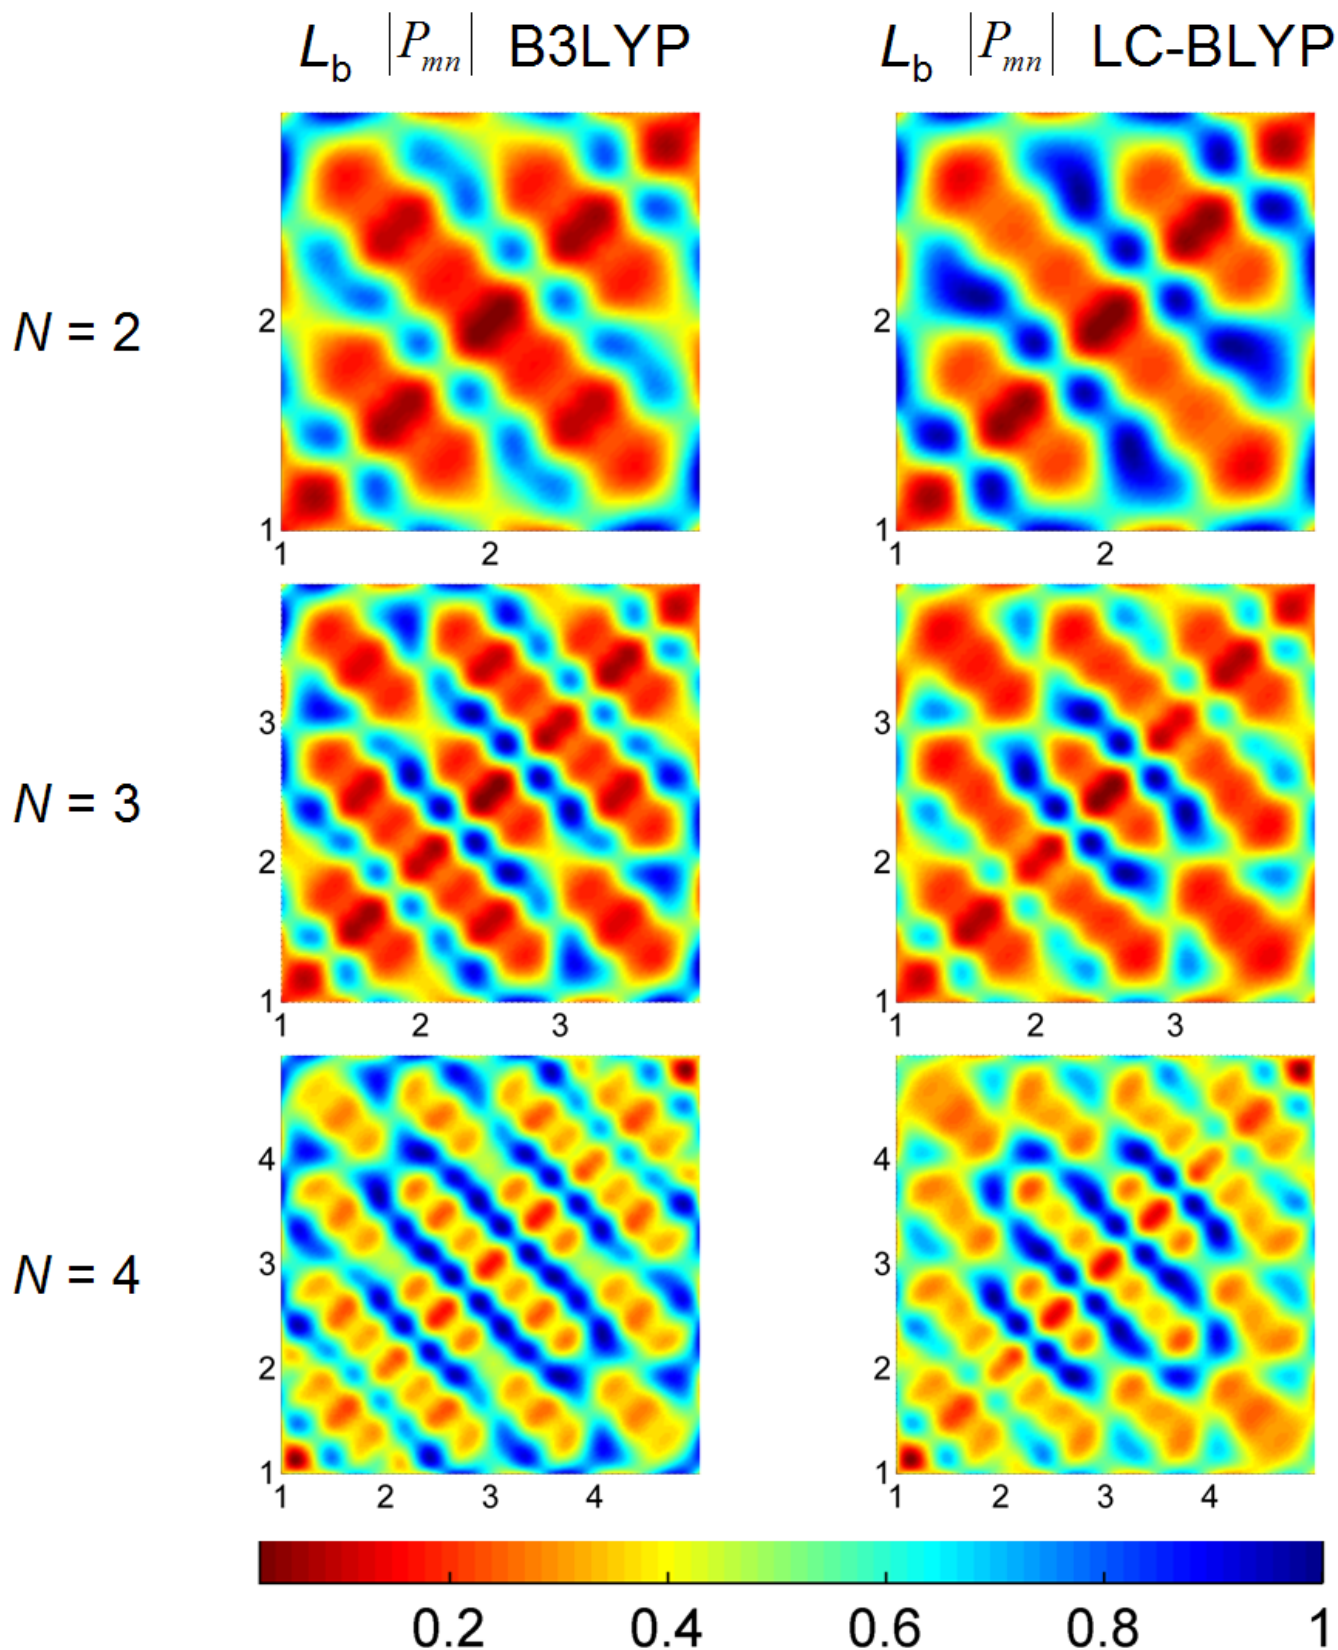

**Figure SI-10.** B3LYP and LC-BLYP contour plots of momentum density matrices ( $\mathbf{P}$ ) for the  $L_b$  excited state in the linear acenes. The  $x$ - and  $y$ -axis labels represent the number of benzene repeat units in the molecule. The elements of the momentum matrix,  $P_{mn}$ , represent the probability amplitude of an electron-hole pair oscillation between sites  $m$  ( $x$ -axis) and  $n$  ( $y$ -axis). The color scale is given at the bottom.

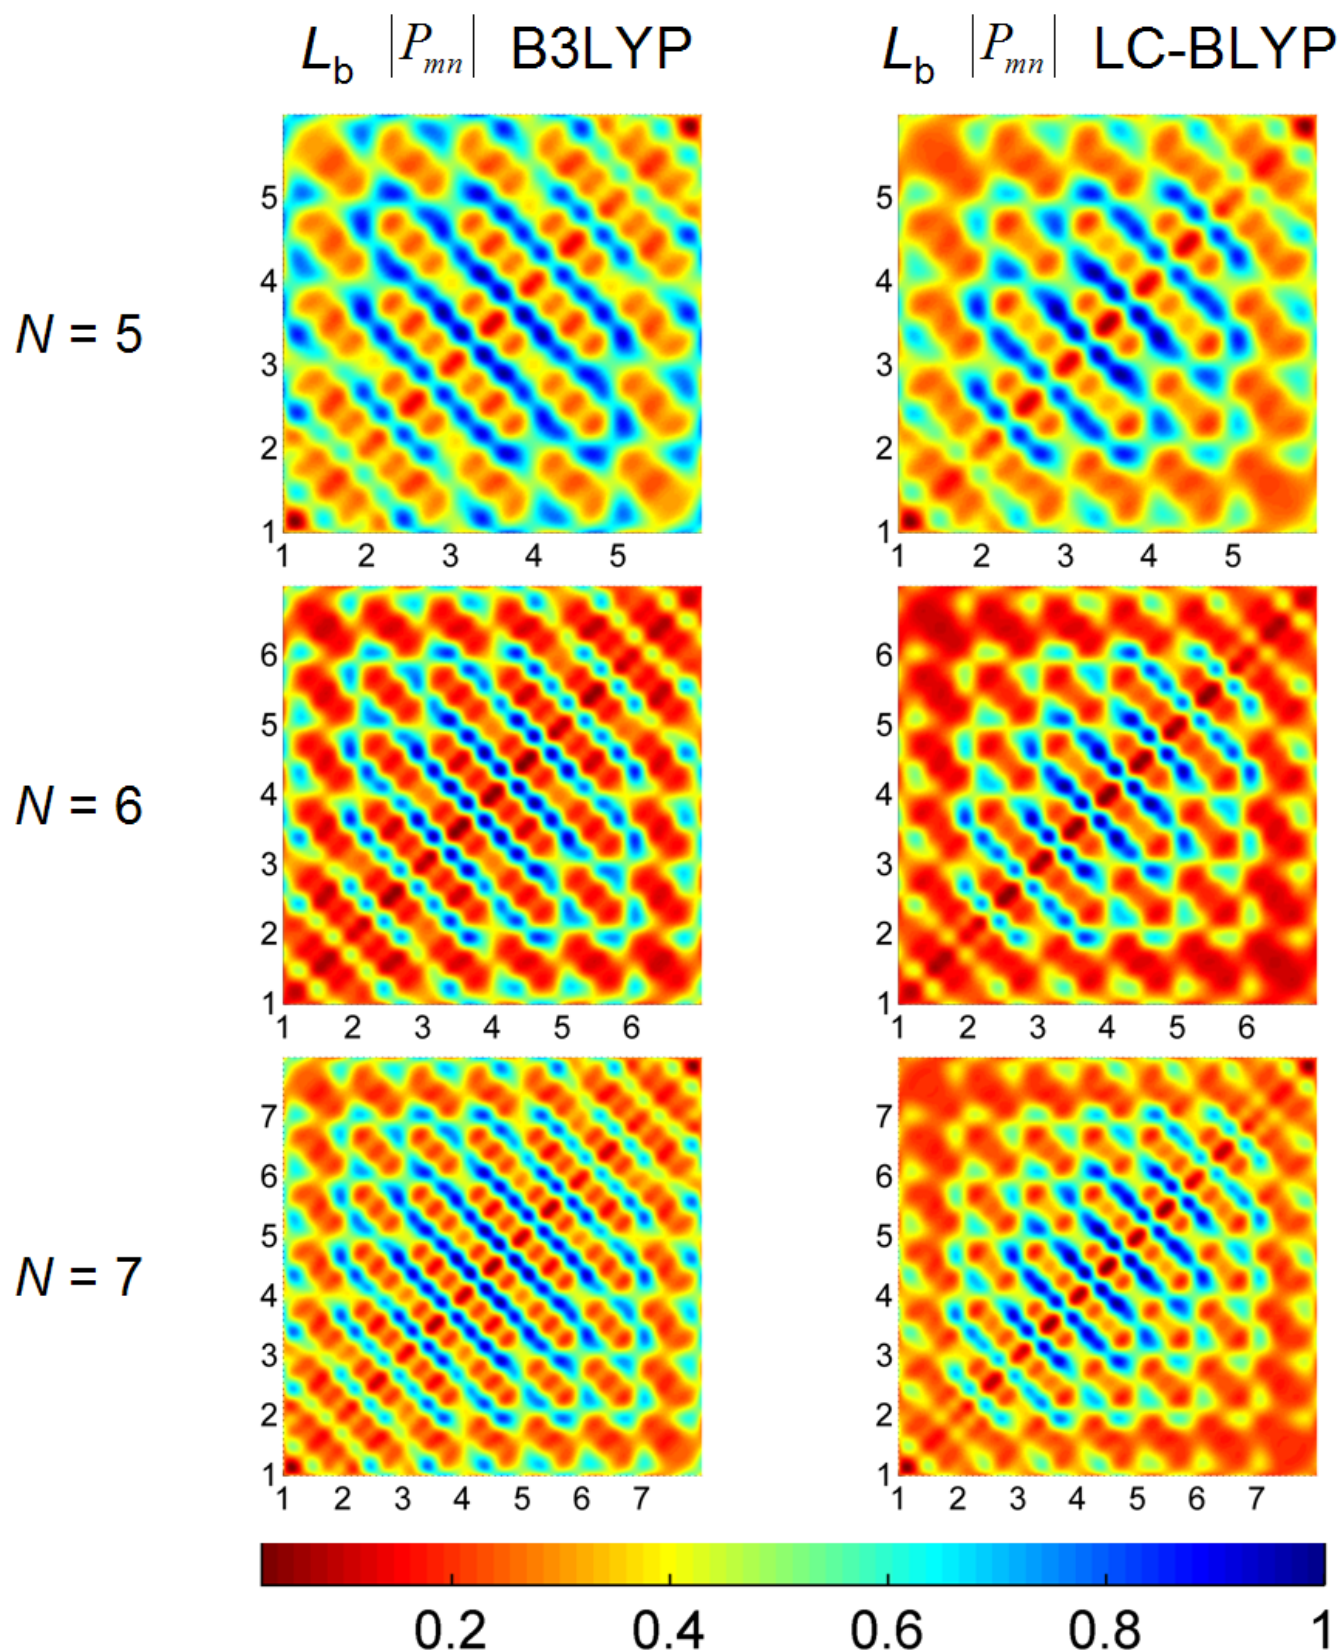

**Figure SI-10 (continued).** B3LYP and LC-BLYP contour plots of momentum density matrices ( $\mathbf{P}$ ) for the  $L_b$  excited state in the linear acenes. The  $x$ - and  $y$ -axis labels represent the number of benzene repeat units in the molecule. The elements of the momentum matrix,  $P_{mn}$ , represent the probability amplitude of an electron-hole pair oscillation between sites  $m$  ( $x$ -axis) and  $n$  ( $y$ -axis). The color scale is given at the bottom.



Cartesian coordinates (in Å) of naphthalene ( $n = 2$  benzene rings) optimized at the B3LYP/cc-pVTZ level of theory:

|   |               |               |              |
|---|---------------|---------------|--------------|
| C | 2.4242914223  | -0.7061098504 | 0.0000000000 |
| C | -2.4242914223 | -0.7061098504 | 0.0000000000 |
| C | 2.4242914223  | 0.7061098504  | 0.0000000000 |
| C | -2.4242914223 | 0.7061098504  | 0.0000000000 |
| C | 1.2408323810  | -1.3973210183 | 0.0000000000 |
| C | -1.2408323810 | -1.3973210183 | 0.0000000000 |
| C | 1.2408323810  | 1.3973210183  | 0.0000000000 |
| C | -1.2408323810 | 1.3973210183  | 0.0000000000 |
| C | 0.0000000000  | -0.7144236970 | 0.0000000000 |
| C | 0.0000000000  | 0.7144236970  | 0.0000000000 |
| H | 3.3653811664  | -1.2403967226 | 0.0000000000 |
| H | -3.3653811664 | -1.2403967226 | 0.0000000000 |
| H | 3.3653811664  | 1.2403967226  | 0.0000000000 |
| H | -3.3653811664 | 1.2403967226  | 0.0000000000 |
| H | 1.2397310645  | -2.4806271080 | 0.0000000000 |
| H | -1.2397310645 | -2.4806271080 | 0.0000000000 |
| H | 1.2397310645  | 2.4806271080  | 0.0000000000 |
| H | -1.2397310645 | 2.4806271080  | 0.0000000000 |

Cartesian coordinates (in Å) of anthracene ( $n = 3$  benzene rings) optimized at the B3LYP/cc-pVTZ level of theory:

|   |               |               |              |
|---|---------------|---------------|--------------|
| C | 3.6468970622  | -0.7110008858 | 0.0000000000 |
| C | -3.6468970622 | -0.7110008858 | 0.0000000000 |
| C | 3.6468970622  | 0.7110008858  | 0.0000000000 |
| C | -3.6468970622 | 0.7110008858  | 0.0000000000 |
| C | 2.4712791339  | -1.4018601205 | 0.0000000000 |
| C | -2.4712791339 | -1.4018601205 | 0.0000000000 |
| C | 2.4712791339  | 1.4018601205  | 0.0000000000 |
| C | -2.4712791339 | 1.4018601205  | 0.0000000000 |
| C | 1.2191788512  | -0.7202877193 | 0.0000000000 |
| C | -1.2191788512 | -0.7202877193 | 0.0000000000 |
| C | 1.2191788512  | 0.7202877193  | 0.0000000000 |
| C | -1.2191788512 | 0.7202877193  | 0.0000000000 |
| C | 0.0000000000  | -1.3985771347 | 0.0000000000 |
| C | 0.0000000000  | 1.3985771347  | 0.0000000000 |
| H | 4.5898829821  | -1.2418464118 | 0.0000000000 |
| H | -4.5898829821 | -1.2418464118 | 0.0000000000 |
| H | 4.5898829821  | 1.2418464118  | 0.0000000000 |
| H | -4.5898829821 | 1.2418464118  | 0.0000000000 |
| H | 2.4708022790  | -2.4850639561 | 0.0000000000 |
| H | -2.4708022790 | -2.4850639561 | 0.0000000000 |
| H | 2.4708022790  | 2.4850639561  | 0.0000000000 |
| H | -2.4708022790 | 2.4850639561  | 0.0000000000 |
| H | 0.0000000000  | -2.4826915166 | 0.0000000000 |
| H | 0.0000000000  | 2.4826915166  | 0.0000000000 |

Cartesian coordinates (in Å) of tetracene ( $n = 4$  benzene rings) optimized at the B3LYP/cc-pVTZ level of theory:

|   |               |               |              |
|---|---------------|---------------|--------------|
| C | 4.8707847156  | -0.7134000555 | 0.0000000000 |
| C | -4.8707847156 | -0.7134000555 | 0.0000000000 |
| C | 4.8707847156  | 0.7134000555  | 0.0000000000 |
| C | -4.8707847156 | 0.7134000555  | 0.0000000000 |
| C | 3.6987015651  | -1.4041629857 | 0.0000000000 |
| C | -3.6987015651 | -1.4041629857 | 0.0000000000 |
| C | 3.6987015651  | 1.4041629857  | 0.0000000000 |
| C | -3.6987015651 | 1.4041629857  | 0.0000000000 |
| C | 2.4413311670  | -0.7237433440 | 0.0000000000 |
| C | -2.4413311670 | -0.7237433440 | 0.0000000000 |
| C | 2.4413311670  | 0.7237433440  | 0.0000000000 |
| C | -2.4413311670 | 0.7237433440  | 0.0000000000 |
| C | 1.2311704214  | -1.4013881947 | 0.0000000000 |
| C | -1.2311704214 | -1.4013881947 | 0.0000000000 |
| C | 1.2311704214  | 1.4013881947  | 0.0000000000 |
| C | -1.2311704214 | 1.4013881947  | 0.0000000000 |
| C | 0.0000000000  | -0.7238765320 | 0.0000000000 |
| C | 0.0000000000  | 0.7238765320  | 0.0000000000 |
| H | 5.8146717746  | -1.2425906719 | 0.0000000000 |
| H | -5.8146717746 | -1.2425906719 | 0.0000000000 |
| H | 5.8146717746  | 1.2425906719  | 0.0000000000 |
| H | -5.8146717746 | 1.2425906719  | 0.0000000000 |
| H | 3.6986516330  | -2.4873420056 | 0.0000000000 |
| H | -3.6986516330 | -2.4873420056 | 0.0000000000 |
| H | 3.6986516330  | 2.4873420056  | 0.0000000000 |
| H | -3.6986516330 | 2.4873420056  | 0.0000000000 |
| H | 1.2315244388  | -2.4853816667 | 0.0000000000 |
| H | -1.2315244388 | -2.4853816667 | 0.0000000000 |
| H | 1.2315244388  | 2.4853816667  | 0.0000000000 |
| H | -1.2315244388 | 2.4853816667  | 0.0000000000 |

Cartesian coordinates (in Å) of pentacene ( $n = 5$  benzene rings) optimized at the B3LYP/cc-pVTZ level of theory:

|   |               |               |              |
|---|---------------|---------------|--------------|
| C | 6.0952486157  | -0.7146604735 | 0.0000000000 |
| C | -6.0952486157 | -0.7146604735 | 0.0000000000 |
| C | 6.0952486157  | 0.7146604735  | 0.0000000000 |
| C | -6.0952486157 | 0.7146604735  | 0.0000000000 |
| C | 4.9249404729  | -1.4054104710 | 0.0000000000 |
| C | -4.9249404729 | -1.4054104710 | 0.0000000000 |
| C | 4.9249404729  | 1.4054104710  | 0.0000000000 |
| C | -4.9249404729 | 1.4054104710  | 0.0000000000 |
| C | 3.6649313260  | -0.7256145237 | 0.0000000000 |
| C | -3.6649313260 | -0.7256145237 | 0.0000000000 |
| C | 3.6649313260  | 0.7256145237  | 0.0000000000 |
| C | -3.6649313260 | 0.7256145237  | 0.0000000000 |
| C | 2.4591388656  | -1.4030006551 | 0.0000000000 |
| C | -2.4591388656 | -1.4030006551 | 0.0000000000 |
| C | 2.4591388656  | 1.4030006551  | 0.0000000000 |
| C | -2.4591388656 | 1.4030006551  | 0.0000000000 |
| C | 1.2219278852  | -0.7263478100 | 0.0000000000 |
| C | -1.2219278852 | -0.7263478100 | 0.0000000000 |
| C | 1.2219278852  | 0.7263478100  | 0.0000000000 |
| C | -1.2219278852 | 0.7263478100  | 0.0000000000 |
| C | 0.0000000000  | -1.4034922552 | 0.0000000000 |
| C | 0.0000000000  | 1.4034922552  | 0.0000000000 |
| H | 7.0395992066  | -1.2429921076 | 0.0000000000 |
| H | -7.0395992066 | -1.2429921076 | 0.0000000000 |
| H | 7.0395992066  | 1.2429921076  | 0.0000000000 |
| H | -7.0395992066 | 1.2429921076  | 0.0000000000 |
| H | 4.9251366281  | -2.4885747964 | 0.0000000000 |
| H | -4.9251366281 | -2.4885747964 | 0.0000000000 |
| H | 4.9251366281  | 2.4885747964  | 0.0000000000 |
| H | -4.9251366281 | 2.4885747964  | 0.0000000000 |
| H | 2.4597882374  | -2.4869615272 | 0.0000000000 |
| H | -2.4597882374 | -2.4869615272 | 0.0000000000 |
| H | 2.4597882374  | 2.4869615272  | 0.0000000000 |
| H | -2.4597882374 | 2.4869615272  | 0.0000000000 |
| H | 0.0000000000  | -2.4873454816 | 0.0000000000 |
| H | 0.0000000000  | 2.4873454816  | 0.0000000000 |

Cartesian coordinates (in Å) of hexacene ( $n = 6$  benzene rings) optimized at the B3LYP/cc-pVTZ level of theory:

|   |               |               |              |
|---|---------------|---------------|--------------|
| C | 7.3200013995  | -0.7153487361 | 0.0000000000 |
| C | -7.3200013995 | -0.7153487361 | 0.0000000000 |
| C | 7.3200013995  | 0.7153487361  | 0.0000000000 |
| C | -7.3200013995 | 0.7153487361  | 0.0000000000 |
| C | 6.1506427228  | -1.4061029078 | 0.0000000000 |
| C | -6.1506427228 | -1.4061029078 | 0.0000000000 |
| C | 6.1506427228  | 1.4061029078  | 0.0000000000 |
| C | -6.1506427228 | 1.4061029078  | 0.0000000000 |
| C | 4.8892318037  | -0.7266560821 | 0.0000000000 |
| C | -4.8892318037 | -0.7266560821 | 0.0000000000 |
| C | 4.8892318037  | 0.7266560821  | 0.0000000000 |
| C | -4.8892318037 | 0.7266560821  | 0.0000000000 |
| C | 3.6857317690  | -1.4039306318 | 0.0000000000 |
| C | -3.6857317690 | -1.4039306318 | 0.0000000000 |
| C | 3.6857317690  | 1.4039306318  | 0.0000000000 |
| C | -3.6857317690 | 1.4039306318  | 0.0000000000 |
| C | 2.4453431457  | -0.7277631416 | 0.0000000000 |
| C | -2.4453431457 | -0.7277631416 | 0.0000000000 |
| C | 2.4453431457  | 0.7277631416  | 0.0000000000 |
| C | -2.4453431457 | 0.7277631416  | 0.0000000000 |
| C | 1.2280904353  | -1.4047554194 | 0.0000000000 |
| C | -1.2280904353 | -1.4047554194 | 0.0000000000 |
| C | 1.2280904353  | 1.4047554194  | 0.0000000000 |
| C | -1.2280904353 | 1.4047554194  | 0.0000000000 |
| C | 0.0000000000  | -0.7283252551 | 0.0000000000 |
| C | 0.0000000000  | 0.7283252551  | 0.0000000000 |
| H | 8.2646028515  | -1.2432111889 | 0.0000000000 |
| H | -8.2646028515 | -1.2432111889 | 0.0000000000 |
| H | 8.2646028515  | 1.2432111889  | 0.0000000000 |
| H | -8.2646028515 | 1.2432111889  | 0.0000000000 |
| H | 6.1509813623  | -2.4892582500 | 0.0000000000 |
| H | -6.1509813623 | -2.4892582500 | 0.0000000000 |
| H | 6.1509813623  | 2.4892582500  | 0.0000000000 |
| H | -6.1509813623 | 2.4892582500  | 0.0000000000 |
| H | 3.6865491432  | -2.4878743772 | 0.0000000000 |
| H | -3.6865491432 | -2.4878743772 | 0.0000000000 |
| H | 3.6865491432  | 2.4878743772  | 0.0000000000 |
| H | -3.6865491432 | 2.4878743772  | 0.0000000000 |
| H | 1.2283855812  | -2.4885686822 | 0.0000000000 |
| H | -1.2283855812 | -2.4885686822 | 0.0000000000 |
| H | 1.2283855812  | 2.4885686822  | 0.0000000000 |
| H | -1.2283855812 | 2.4885686822  | 0.0000000000 |

Cartesian coordinates (in Å) of heptacene ( $n = 7$  benzene rings) optimized at the B3LYP/cc-pVTZ level of theory:

|   |               |               |              |
|---|---------------|---------------|--------------|
| C | 8.5449063012  | -0.7157347725 | 0.0000000000 |
| C | -8.5449063012 | -0.7157347725 | 0.0000000000 |
| C | 8.5449063012  | 0.7157347725  | 0.0000000000 |
| C | -8.5449063012 | 0.7157347725  | 0.0000000000 |
| C | 7.3760759541  | -1.4064952292 | 0.0000000000 |
| C | -7.3760759541 | -1.4064952292 | 0.0000000000 |
| C | 7.3760759541  | 1.4064952292  | 0.0000000000 |
| C | -7.3760759541 | 1.4064952292  | 0.0000000000 |
| C | 6.1138921927  | -0.7272463444 | 0.0000000000 |
| C | -6.1138921927 | -0.7272463444 | 0.0000000000 |
| C | 6.1138921927  | 0.7272463444  | 0.0000000000 |
| C | -6.1138921927 | 0.7272463444  | 0.0000000000 |
| C | 4.9116527936  | -1.4044690962 | 0.0000000000 |
| C | -4.9116527936 | -1.4044690962 | 0.0000000000 |
| C | 4.9116527936  | 1.4044690962  | 0.0000000000 |
| C | -4.9116527936 | 1.4044690962  | 0.0000000000 |
| C | 3.6695203070  | -0.7285808809 | 0.0000000000 |
| C | -3.6695203070 | -0.7285808809 | 0.0000000000 |
| C | 3.6695203070  | 0.7285808809  | 0.0000000000 |
| C | -3.6695203070 | 0.7285808809  | 0.0000000000 |
| C | 2.4547956302  | -1.4055141475 | 0.0000000000 |
| C | -2.4547956302 | -1.4055141475 | 0.0000000000 |
| C | 2.4547956302  | 1.4055141475  | 0.0000000000 |
| C | -2.4547956302 | 1.4055141475  | 0.0000000000 |
| C | 1.2233699067  | -0.7294889613 | 0.0000000000 |
| C | -1.2233699067 | -0.7294889613 | 0.0000000000 |
| C | 1.2233699067  | 0.7294889613  | 0.0000000000 |
| C | -1.2233699067 | 0.7294889613  | 0.0000000000 |
| C | 0.0000000000  | -1.4058348048 | 0.0000000000 |
| C | 0.0000000000  | 1.4058348048  | 0.0000000000 |
| H | 9.4896469022  | -1.2433334947 | 0.0000000000 |
| H | -9.4896469022 | -1.2433334947 | 0.0000000000 |
| H | 9.4896469022  | 1.2433334947  | 0.0000000000 |
| H | -9.4896469022 | 1.2433334947  | 0.0000000000 |
| H | 7.3764974714  | -2.4896442426 | 0.0000000000 |
| H | -7.3764974714 | -2.4896442426 | 0.0000000000 |
| H | 7.3764974714  | 2.4896442426  | 0.0000000000 |
| H | -7.3764974714 | 2.4896442426  | 0.0000000000 |
| H | 4.9125689218  | -2.4884025749 | 0.0000000000 |
| H | -4.9125689218 | -2.4884025749 | 0.0000000000 |
| H | 4.9125689218  | 2.4884025749  | 0.0000000000 |
| H | -4.9125689218 | 2.4884025749  | 0.0000000000 |
| H | 2.4552571880  | -2.4893069616 | 0.0000000000 |
| H | -2.4552571880 | -2.4893069616 | 0.0000000000 |
| H | 2.4552571880  | 2.4893069616  | 0.0000000000 |
| H | -2.4552571880 | 2.4893069616  | 0.0000000000 |
| H | 0.0000000000  | -2.4896051808 | 0.0000000000 |
| H | 0.0000000000  | 2.4896051808  | 0.0000000000 |
